# Supplementary material for: Non-noble electrocatalysts discovered by scaling relations of Gibbs-free energies of key oxygen adsorbates in water oxidation
Source: Royal Society of Chemistry journal article supplement (doi:10.1039/d2ta02594a), 2022-01-01
Supplement: d2ta02594a1.pdf [file d2ta02594a1.pdf]

## Supporting Information for

# Non-noble electrocatalysts discovered by instinctive scaling relations of Gibbs-free energies of key oxygen adsorbates in water oxidation

*Jihyeon Park<sup>a,b</sup>, Sinwoo Kang<sup>a,b</sup>, Jaeyoung Lee<sup>a,b,c,\*</sup>*

<sup>a</sup> School of Earth Sciences and Environmental Engineering, Gwangju Institute of Science and Technology, 123 Cheomdangwagi-ro, Buk-gu, Gwangju 61005, South Korea.

<sup>b</sup> International Future Research Center of Chemical Energy Storage and Conversion Processes, Gwangju Institute of Science and Technology, 123 Cheomdangwagi-ro, Buk-gu, Gwangju 61005, South Korea.

<sup>c</sup> Ertl Center for Electrochemistry and Catalysis, Gwangju Institute of Science and Technology, 123 Cheomdangwagi-ro, Buk-gu, Gwangju 61005, South Korea.

### AUTHOR INFORMATION

#### Corresponding Author

\*E-mail: jaeyoung@gist.ac.kr

Tel.: +82-61-715-2579

## ***Experimental methods***

### ***Preparation of database***

The potentials ( $V_\kappa$ ) at a specific current density ( $\kappa$ ) were extracted from the cycled CV curves using Algorithm S1, which is visualized in Scheme S1. In the alkaline OER, the forward scan produces the oxidation peak of nickel (oxy)hydroxide; therefore, the backward scan of the CV cycles was used instead. The backward scan was conducted only in the potential range where the partial derivative of the time to voltage was negative (i.e., the first step in Algorithm S1). We then found the index ranges of the two current density points whose current density signs were reversed based on the specific current density (i.e., the third step). The potential ( $V_\kappa$ ) located at the intersection of a linear function passing through two actual points ( $(V_{ij}, j)$ ,  $(V_{i+1}, j_{i+1})$ ) and the specific current density becomes the desired value (i.e., the fourth and fifth steps). This process was repeated for each specific current density ( $\kappa$ : 1, 5, 10, and 20 mA cm<sup>-2</sup>), and the intersectional potentials were obtained automatically for all cycles. Overpotentials ( $\eta_\kappa$ ) were calculated by subtracting 1.23 from the potentials ( $V_\kappa$ ).

### ***Operational environment of deep symbolic regression (DSR)***

All code was written in Python 3.6.13 with the Jupyter-Notebook. The version of the DSR algorithm was 1.1.dev0 requiring TensorFlow 1.14.0. Computer specifications were as follows: CPU: AMD Ryzen 9 5900X, a 12-core processor with a base clock of 3.70 GHz; RAM: Samsung DDR4-3200 16 GB (1600 MHz) × 2; and GPU: NVIDIA GeForce RTX3080 10 GB (8704 CUDA-core).

The hyperparameters for the DSR algorithm were as follows. The minimum and maximum lengths of expression were 4 and 30, respectively. A total of 4,000 equations were generated by the DSR algorithm at every step, and the DSR performed 10,000 steps in total (i.e., 40,000,000 empirical equations were evaluated at every specific current density). The mathematical symbol library included the following operators:

$+$ ,  $-$ ,  $\times$ ,  $\div$ ,  $\sin$ ,  $\cos$ ,  $\ln$ ,  $\exp$ , and  
 $\sqrt{x}$

Precision score evaluation was performed using the normalized root-mean-square error (NRMSE) (Eqs. S1 and S2):

$$\text{precision score} = 1/(1 + \text{NRMSE}). \tag{S1}$$

$$\text{NRMSE} = \frac{\sqrt{\frac{1}{n} \sum (\hat{y} - y)^2}}{\sigma} \tag{S2}$$

## Tables

**Table S1.** The hyperparameter of the DSR algorithm for finding the empirical equation between Fe composition and the specific current density (@ 350 mV)

| <i>specification</i> |                                     |             |
|----------------------|-------------------------------------|-------------|
| Dataset ( $X$ )      | Fe composition ( $0 < X < 1$ )      |             |
| Target value ( $Y$ ) | Specific current density (@ 350 mV) |             |
| Equations per step   | 100                                 |             |
| Total steps          | 2000                                |             |
| Symbol library       | +, -, ×, ÷, <i>const</i>            |             |
| Constant range       | Min.                                | <i>null</i> |
|                      | Max.                                | 10          |

**Table S2.** Physical properties as functions of the metal oxidation state

|                           | $N_d$ | $\chi^{12}$ | <i>Radii</i> (Å) <sup>13</sup> |
|---------------------------|-------|-------------|--------------------------------|
| Fe <sup>3+</sup> (CN=6)   | 5     | 1.83        | 0.69                           |
| Fe <sup>4+</sup> (CN=6)   | 4     | 1.83        | 0.725                          |
| Ni <sup>2+</sup> (CN=6)   | 8     | 1.91        | 0.83                           |
| Ni <sup>3+</sup> (CN=6)   | 7     | 1.91        | 0.7                            |
| Ni <sup>3.5+</sup> (CN=6) | 6.5   | 1.91        | 0.66                           |
| Ni <sup>4+</sup> (CN=6)   | 6     | 1.91        | 0.62                           |

CN = Coordination number



$\max(\Delta G_i), ESSI$  0.7907

$$\frac{\chi}{N_d - e \left( \Delta G_2 \cdot \left( \frac{N_d \cdot \chi \cdot (-\Delta G_2 + \ln(\Delta G_4))}{\Delta G_3} \right) - \Delta G_2 \right)}$$

0.9123

## Algorithms

---

### Algorithm S1. Finding the intersection point

---

**Input** potential  $V_i$ ; current density  $j_i$ ; time  $S$ ; specific current density  $\kappa$

**Output** list of intersection points  $[V_\kappa]$

1:  $V_i \leftarrow \left\{ \frac{\partial V_i}{\partial S} < 0 \right\}$  ▷ Select the backward scan

2: **repeat**

3:  $i \leftarrow \{(j_i - \kappa)(j_{i+1} - \kappa) < 0\}$  ▷ Find the index range having intersection points

4:  $x \leftarrow \left\{ (y - j_i) = \frac{j_i - j_{i+1}}{V_i - V_{i+1}} (x - V_i) \right\}_{y = \kappa}$  ▷ Find intersection points

5:  $V_\kappa \leftarrow x$  ▷ Correspond finding values to intersection points

6:  $[V_\kappa] \leftarrow \text{append } V_\kappa$  ▷ Append the list of intersection points

7: **return**  $[V_\kappa]$

---

## *Equations*

$$y = \frac{a(X - b)}{X^7 - cX^6 + dX^5 + eX^2 + f} \quad (\text{S3})$$

where,  $a = 0.1746584776011356$ ,

$b = 0.00013673749166442201$ ,

$c = 1.107216991218484$ ,

$d = 0.2909237571852588$ ,

$e = 0.013027824990815723$ ,

$f = 0.00010240969795094333$

$$(X,y)|_{y=0} = (0.0869, 75.33) \quad (\text{S4})$$



*Schemes*

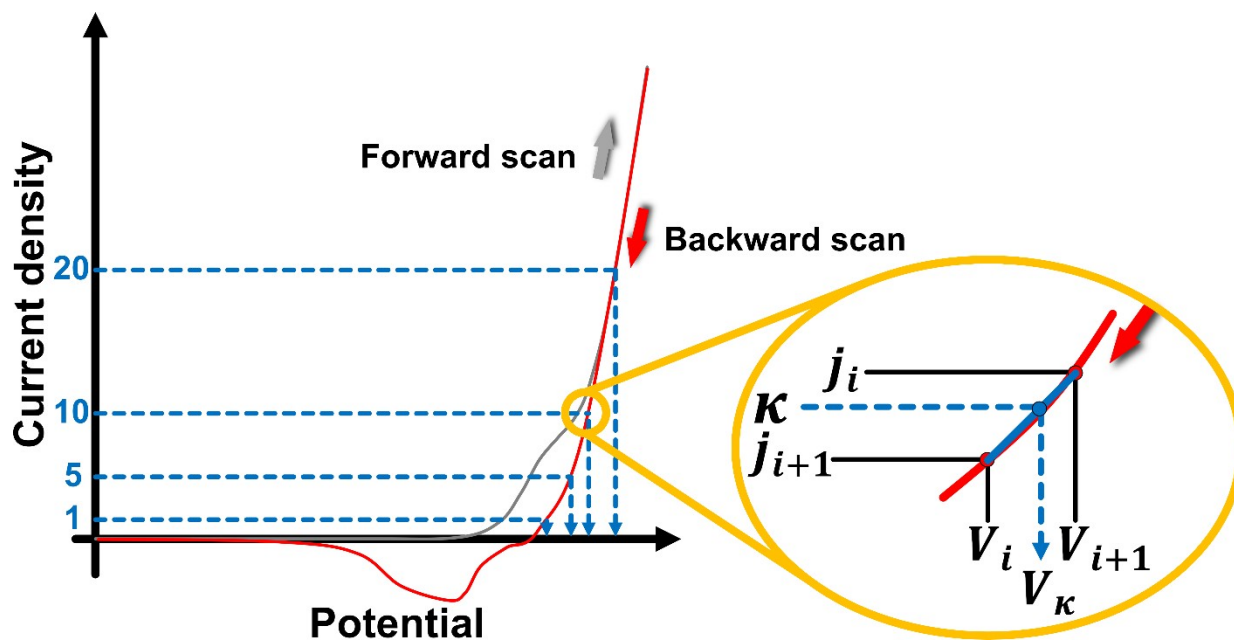

**Scheme S1.** Schematic of the algorithm extracting the specific potentials from the CV curve.

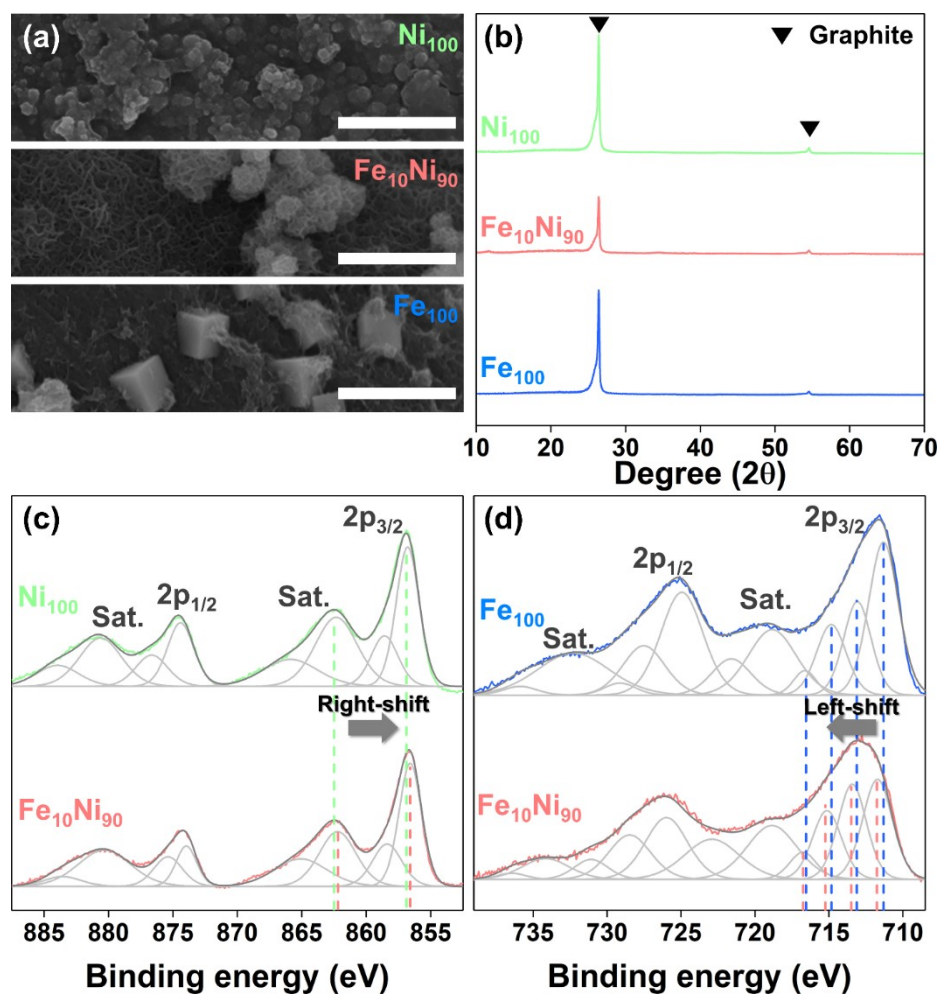

## Figures

**Figure S1.** (a) SEM images of three different catalysts for OER; all scale bars for Fig. 1a correspond to 1  $\mu\text{m}$ ; (b) GI-XRD patterns that confirm the crystallinity of ultra-thin surface; and XPS profiles of (c) Ni 2p and (d) Fe 2p.

The morphological properties of the prepared catalysts, viz.  $\text{FeNiO}_x\text{H}_y$  at three different ratios, were analyzed by FE-SEM (Figure S2a). A cube-like structure with a side of approximately 500 nm was observed on the electrodeposited surface of the pure Fe. In contrast, the surface-electrodeposited pure Ni appeared in the form of segregated nanoparticles.  $\text{FeNiO}_x\text{H}_y$  of mixed

ratio was uniformly electrodeposited on the carbon paper. Since the crystallinity of all samples (with the exception of the carbon paper) could not be detected by conventional XRD, we decided to use GI-XRD to analyze the crystallinity of the ultrathin film (Figure S2b). However, the crystallinity of the samples could not be confirmed using GI-XRD; thus, it was concluded that all catalysts were in amorphous phase. In Figure S2c, the XPS profiles of Ni 2p<sub>3/2</sub> show two main peaks at ~856.8 and ~858.6 eV, corresponding to Ni<sup>2+</sup> and Ni<sup>3+</sup>, respectively.<sup>21,22</sup> Both peaks were right-shifted from Ni<sub>100</sub> to Fe<sub>10</sub>Ni<sub>90</sub>, implying that Fe with a relatively low binding energy was successfully inserted into the Ni matrix. Similarly, compared to pure Fe, the four peak positions of Fe<sub>10</sub>Ni<sub>90</sub> in Fe 2p<sub>3/2</sub> were left-shifted because of the relatively higher binding energy of Ni (Figure S2d).<sup>22-25</sup> The changes in binding energy, as confirmed by XPS, indicated that the oxidation states of Fe and Ni were unpredictable with respect to the ratios.

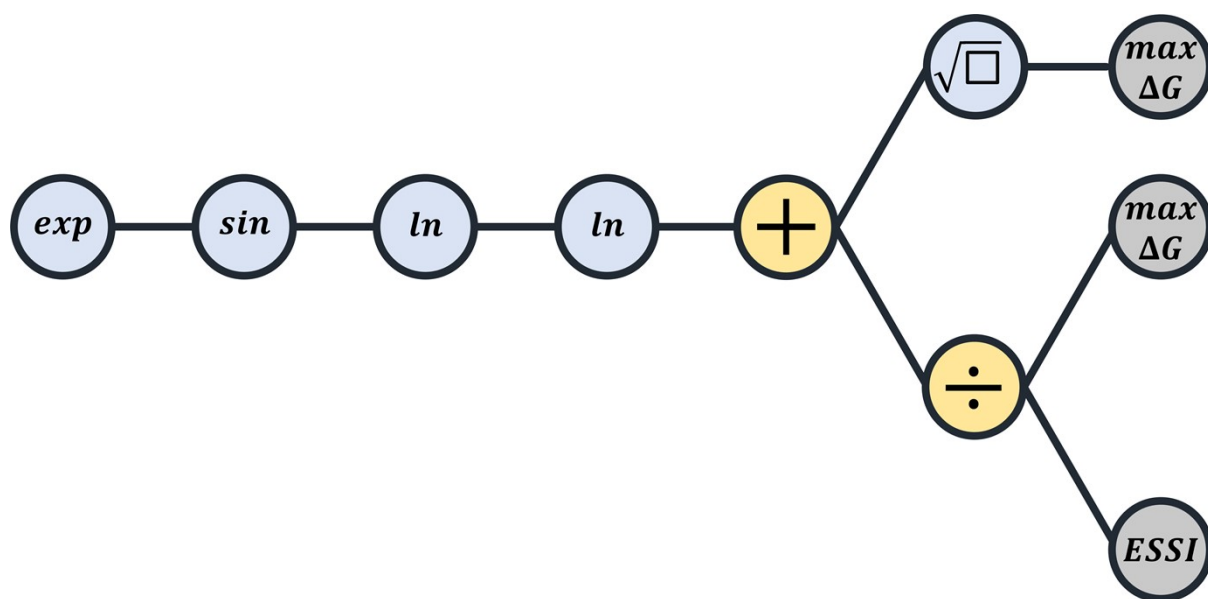

**Figure S2.** Tree-like structure of the completed equation.

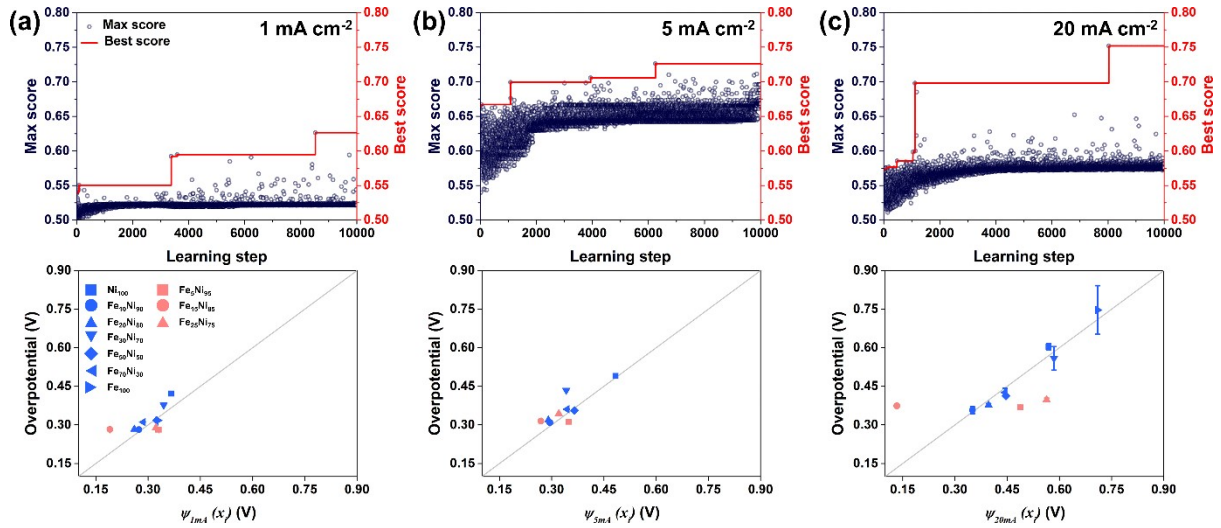

**Figure S3.** Score graph (upper) as a function of learning steps and reformatted graph (bottom) based on the best equation, with a gray solid line corresponding to the  $y = x$  graph. The empirical equations express the overpotentials at (a)  $1 \text{ mA cm}^{-2}$ , (b)  $5 \text{ mA cm}^{-2}$ , and (c)  $20 \text{ mA cm}^{-2}$ , respectively.<sup>a</sup>

<sup>a</sup> The first-ranked equation

$$\text{at } 1 \text{ mA cm}^{-2}: \eta_{1 \text{ mA cm}^{-2}} = \frac{\sin\left(\frac{\Delta G_4 \cdot \sqrt{ESSI}}{\max(\Delta G_i)}\right)}{4\gamma}$$

$$\text{, at } 5 \text{ mA cm}^{-2}: \eta_{5 \text{ mA cm}^{-2}} = \frac{ESSI}{\Delta G_2 \cdot \max(\Delta G_i) \cdot \left(\gamma + (\Delta G_2)^2 \cdot \left(\frac{-N_d \cdot \Delta G_2 + \gamma \cdot \Delta G_1}{\Delta G_3}\right) + \sin(\gamma)\right) + \Delta G_4}$$

$$\text{, and at } 20 \text{ mA cm}^{-2}: \eta_{20 \text{ mA cm}^{-2}} = -\gamma + \max(\Delta G_i) - \sin\left(\gamma - \frac{\Delta G_3}{N_d \cdot \gamma \cdot \max(\Delta G_i) \cdot \sqrt{\gamma \cdot \Delta G_2 \cdot (\gamma^2 + \gamma + \Delta G_4) + \gamma}}\right)$$

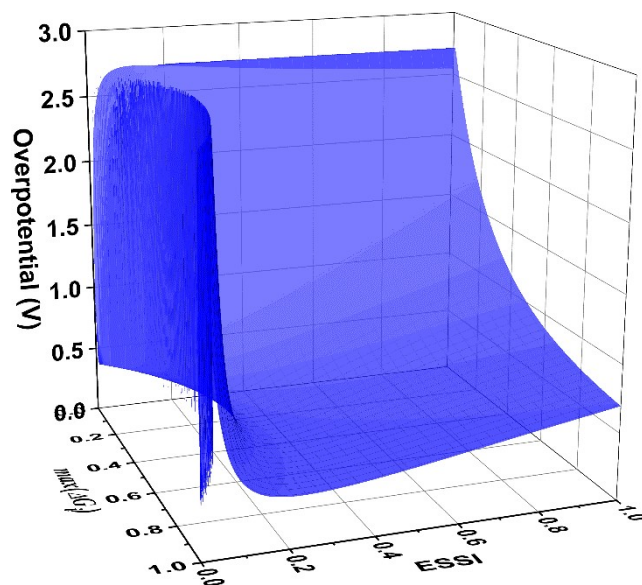

**Figure S4.** Three-dimensional graph of the first-ranked equation for the overpotential at 10  $\text{mA cm}^{-2}$ .

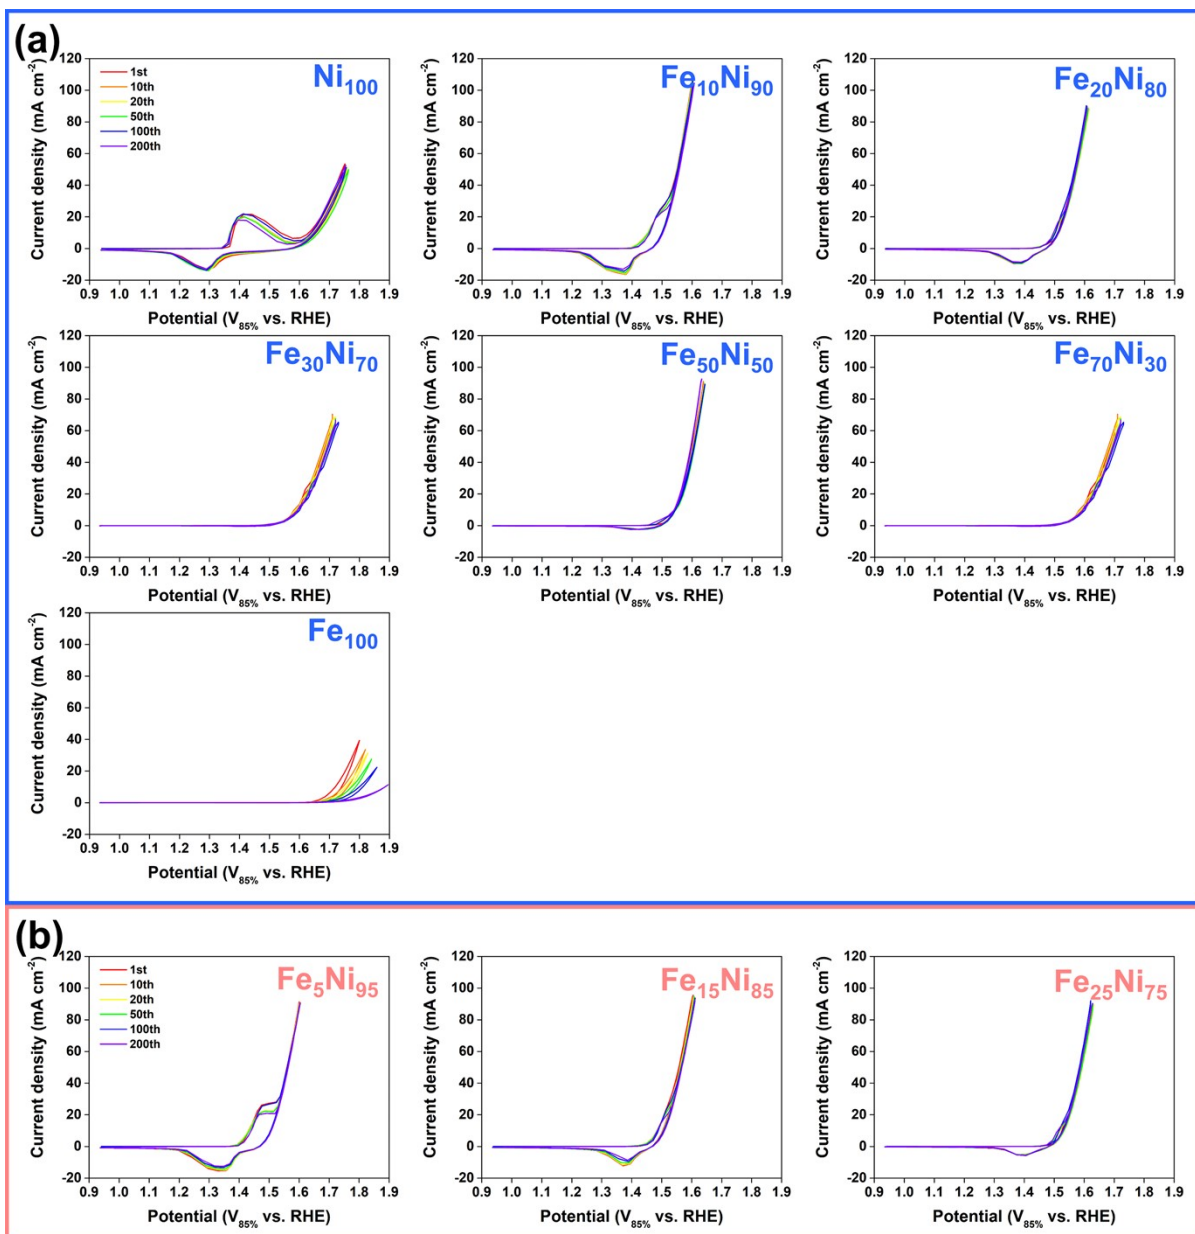

**Figure S5.** CV cycles of FeNiO<sub>x</sub>H<sub>y</sub> at mixed ratio for (a) blue box (database) and (b) pink box (validation).

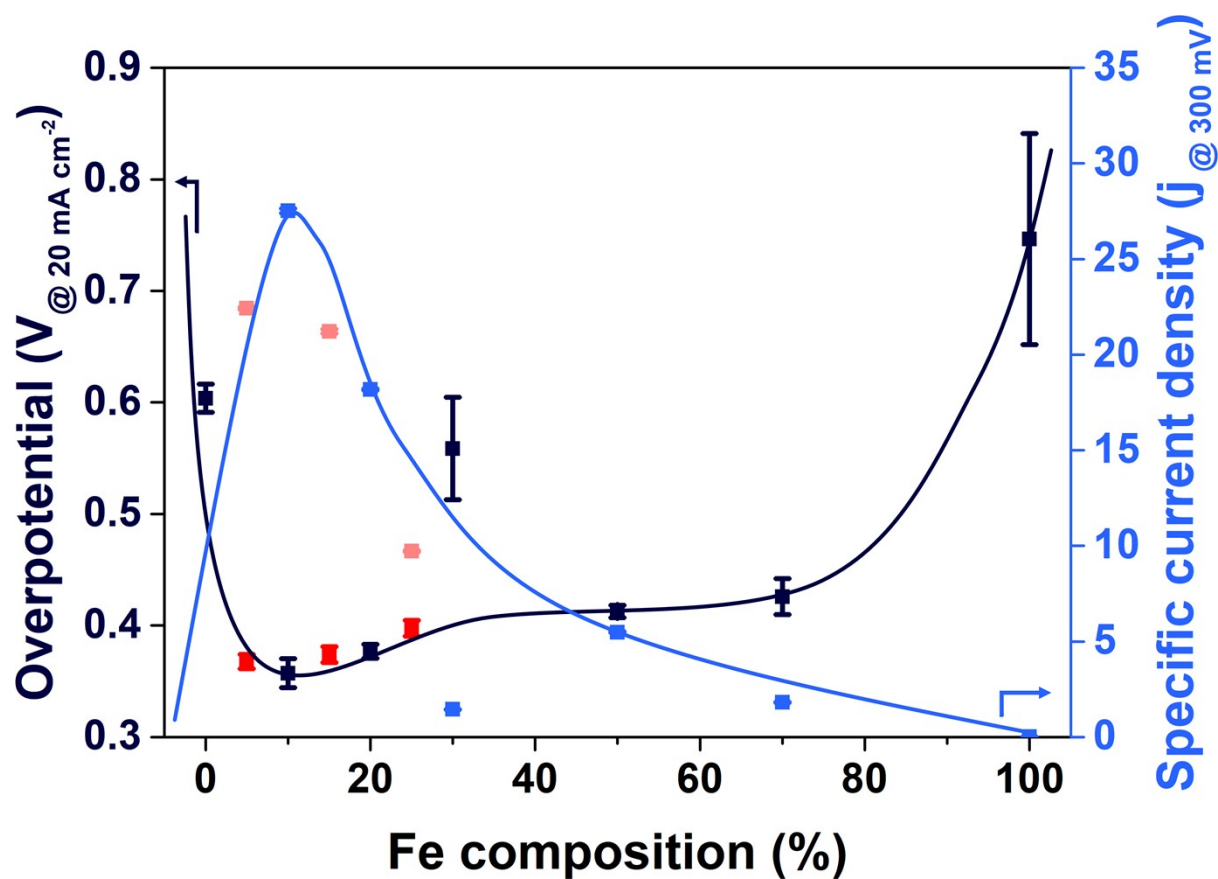

**Figure S6.** OER performance and overpotential of  $\text{FeNiO}_x\text{H}_y$  catalysts at 300 mV and 20 mA  $\text{cm}^{-2}$ , respectively, as functions of Fe composition; blue and indigo-blue ( $\text{Ni}_{100}$ ,  $\text{Fe}_{10}\text{Ni}_{90}$ ,  $\text{Fe}_{20}\text{Ni}_{80}$ ,  $\text{Fe}_{30}\text{Ni}_{70}$ ,  $\text{Fe}_{50}\text{Ni}_{50}$ ,  $\text{Fe}_{70}\text{Ni}_{30}$ , and  $\text{Fe}_{100}$  for database), pink and red ( $\text{Fe}_5\text{Ni}_{95}$ ,  $\text{Fe}_{15}\text{Ni}_{85}$ , and  $\text{Fe}_{25}\text{Ni}_{75}$  for validation).



*Partial database for the empirical equation*

| NiO <sub>x</sub> H <sub>y</sub> | Current density (mA cm <sup>-2</sup> ) |          |          |          |
|---------------------------------|----------------------------------------|----------|----------|----------|
|                                 | 1                                      | 5        | 10       | 20       |
| 1                               | 1.645843                               | 1.717003 | 1.748985 | 1.815176 |
| 2                               | 1.645061                               | 1.715401 | 1.753105 | 1.82218  |
| 3                               | 1.645822                               | 1.715168 | 1.756521 | 1.820305 |
| 4                               | 1.647236                               | 1.717959 | 1.755978 | 1.817149 |
| 5                               | 1.645052                               | 1.718679 | 1.751491 | 1.817834 |
| 6                               | 1.643673                               | 1.716801 | 1.753288 | 1.823942 |
| 7                               | 1.644022                               | 1.715231 | 1.757384 | 1.823532 |
| 8                               | 1.645688                               | 1.717626 | 1.756455 | 1.818324 |
| 9                               | 1.645653                               | 1.719557 | 1.752525 | 1.821069 |
| 10                              | 1.644153                               | 1.717843 | 1.753986 | 1.826485 |
| 11                              | 1.650385                               | 1.718456 | 1.760278 | 1.825656 |
| 12                              | 1.651531                               | 1.721783 | 1.757627 | 1.82148  |
| 13                              | 1.650988                               | 1.722375 | 1.755281 | 1.825416 |
| 14                              | 1.649514                               | 1.71953  | 1.75826  | 1.83202  |
| 15                              | 1.650473                               | 1.718697 | 1.761321 | 1.829124 |
| 16                              | 1.651756                               | 1.721682 | 1.759824 | 1.823853 |
| 17                              | 1.651309                               | 1.722904 | 1.755982 | 1.826316 |
| 18                              | 1.650111                               | 1.720632 | 1.757675 | 1.83272  |
| 19                              | 1.650368                               | 1.719467 | 1.761525 | 1.830289 |
| 20                              | 1.652006                               | 1.721793 | 1.760236 | 1.825274 |
| 21                              | 1.651731                               | 1.723534 | 1.756357 | 1.828137 |
| 22                              | 1.650303                               | 1.720503 | 1.758951 | 1.834134 |
| 23                              | 1.650856                               | 1.719758 | 1.762016 | 1.83231  |
| 24                              | 1.65217                                | 1.72251  | 1.760285 | 1.826183 |
| 25                              | 1.651686                               | 1.723675 | 1.757038 | 1.830377 |
| 26                              | 1.650463                               | 1.720582 | 1.759695 | 1.835599 |
| 27                              | 1.651503                               | 1.720331 | 1.763041 | 1.830848 |
| 28                              | 1.652422                               | 1.72328  | 1.759423 | 1.827676 |
| 29                              | 1.651487                               | 1.723872 | 1.757318 | 1.833185 |
| 30                              | 1.650512                               | 1.72067  | 1.761706 | 1.836775 |
| 31                              | 1.652024                               | 1.721141 | 1.762816 | 1.830848 |

|    |          |          |          |          |
|----|----------|----------|----------|----------|
| 32 | 1.652482 | 1.724174 | 1.758182 | 1.829125 |
| 33 | 1.650941 | 1.723497 | 1.757822 | 1.835495 |
| 34 | 1.6507   | 1.720627 | 1.762564 | 1.836507 |
| 35 | 1.65271  | 1.722707 | 1.762505 | 1.830264 |
| 36 | 1.652456 | 1.724424 | 1.758435 | 1.832164 |
| 37 | 1.651027 | 1.721749 | 1.760668 | 1.838528 |
| 38 | 1.651683 | 1.720784 | 1.764099 | 1.835442 |
| 39 | 1.652833 | 1.723709 | 1.761154 | 1.831032 |
| 40 | 1.651896 | 1.724594 | 1.758743 | 1.83622  |
| 41 | 1.650926 | 1.721263 | 1.762509 | 1.839518 |
| 42 | 1.652556 | 1.722017 | 1.76389  | 1.832771 |
| 43 | 1.653093 | 1.724973 | 1.75921  | 1.831784 |
| 44 | 1.651169 | 1.723227 | 1.759912 | 1.839668 |
| 45 | 1.651426 | 1.721184 | 1.764247 | 1.838058 |
| 46 | 1.653059 | 1.723706 | 1.762517 | 1.832295 |
| 47 | 1.652383 | 1.72514  | 1.758688 | 1.836455 |
| 48 | 1.651219 | 1.721723 | 1.762436 | 1.841211 |
| 49 | 1.652283 | 1.721487 | 1.764762 | 1.836569 |
| 50 | 1.653038 | 1.724903 | 1.76063  | 1.832905 |
| 51 | 1.651947 | 1.724605 | 1.759564 | 1.839998 |
| 52 | 1.651178 | 1.721329 | 1.763427 | 1.841918 |
| 53 | 1.652836 | 1.722661 | 1.764773 | 1.834597 |
| 54 | 1.653246 | 1.725198 | 1.760489 | 1.833528 |
| 55 | 1.651559 | 1.724321 | 1.759932 | 1.841095 |
| 56 | 1.651544 | 1.721698 | 1.764116 | 1.841786 |
| 57 | 1.653152 | 1.723145 | 1.764554 | 1.834565 |
| 58 | 1.652958 | 1.725661 | 1.759972 | 1.836097 |
| 59 | 1.651777 | 1.723608 | 1.761005 | 1.842635 |
| 60 | 1.651726 | 1.721845 | 1.764922 | 1.841009 |
| 61 | 1.653341 | 1.724225 | 1.764014 | 1.835244 |
| 62 | 1.653037 | 1.725734 | 1.759859 | 1.837912 |
| 63 | 1.651493 | 1.722394 | 1.762917 | 1.84418  |
| 64 | 1.65239  | 1.721618 | 1.772885 | 1.84037  |
| 65 | 1.653526 | 1.725094 | 1.774905 | 1.835197 |
| 66 | 1.652062 | 1.725169 | 1.760141 | 1.841983 |

|     |          |          |          |          |
|-----|----------|----------|----------|----------|
| 67  | 1.651734 | 1.72196  | 1.763608 | 1.844188 |
| 68  | 1.65295  | 1.722659 | 1.772635 | 1.837497 |
| 69  | 1.653599 | 1.725295 | 1.775702 | 1.835851 |
| 70  | 1.652174 | 1.724914 | 1.778921 | 1.842305 |
| 71  | 1.651547 | 1.72205  | 1.775594 | 1.844758 |
| 72  | 1.653215 | 1.722912 | 1.773175 | 1.837032 |
| 73  | 1.653345 | 1.725681 | 1.776578 | 1.836158 |
| 74  | 1.652021 | 1.724539 | 1.778707 | 1.842601 |
| 75  | 1.651835 | 1.721607 | 1.775796 | 1.845232 |
| 76  | 1.652999 | 1.723065 | 1.77291  | 1.837464 |
| 77  | 1.653873 | 1.725444 | 1.760908 | 1.836479 |
| 78  | 1.65209  | 1.724257 | 1.760489 | 1.844463 |
| 79  | 1.65195  | 1.7217   | 1.764823 | 1.845225 |
| 80  | 1.653565 | 1.722925 | 1.765072 | 1.837577 |
| 81  | 1.653596 | 1.725698 | 1.760866 | 1.837157 |
| 82  | 1.651948 | 1.724077 | 1.760787 | 1.844668 |
| 83  | 1.652153 | 1.7217   | 1.764883 | 1.844343 |
| 84  | 1.653458 | 1.723785 | 1.764945 | 1.837672 |
| 85  | 1.653581 | 1.725409 | 1.760566 | 1.838703 |
| 86  | 1.651884 | 1.722967 | 1.761763 | 1.84626  |
| 87  | 1.652406 | 1.721676 | 1.765673 | 1.843728 |
| 88  | 1.65383  | 1.72428  | 1.763637 | 1.837417 |
| 89  | 1.652961 | 1.725256 | 1.760065 | 1.8427   |
| 90  | 1.651764 | 1.721686 | 1.764012 | 1.84633  |
| 91  | 1.653201 | 1.721971 | 1.765372 | 1.840468 |
| 92  | 1.653782 | 1.724994 | 1.761298 | 1.837657 |
| 93  | 1.652259 | 1.724458 | 1.759675 | 1.844408 |
| 94  | 1.65188  | 1.72145  | 1.76408  | 1.845693 |
| 95  | 1.653236 | 1.722573 | 1.764918 | 1.83831  |
| 96  | 1.653426 | 1.725253 | 1.760036 | 1.838009 |
| 97  | 1.652412 | 1.724235 | 1.7602   | 1.844916 |
| 98  | 1.651851 | 1.721434 | 1.764494 | 1.845625 |
| 99  | 1.653357 | 1.722576 | 1.765107 | 1.838463 |
| 100 | 1.646368 | 1.713843 | 1.75145  | 1.821358 |

| $\text{Fe}_{0.1}\text{Ni}_{0.9}\text{O}_x\text{H}_y$ | Current density ( $\text{mA cm}^{-2}$ ) |          |          |          |
|------------------------------------------------------|-----------------------------------------|----------|----------|----------|
| Measurements                                         | 1                                       | 5        | 10       | 20       |
| 1                                                    | 1.510882                                | 1.5354   | 1.558048 | 1.582248 |
| 2                                                    | 1.511129                                | 1.536879 | 1.55768  | 1.585669 |
| 3                                                    | 1.510388                                | 1.538409 | 1.556282 | 1.585172 |
| 4                                                    | 1.510126                                | 1.538797 | 1.556307 | 1.586143 |
| 5                                                    | 1.50982                                 | 1.538631 | 1.556081 | 1.584645 |
| 6                                                    | 1.509833                                | 1.53787  | 1.5584   | 1.581404 |
| 7                                                    | 1.510493                                | 1.53664  | 1.559593 | 1.580199 |
| 8                                                    | 1.510967                                | 1.535931 | 1.559662 | 1.580543 |
| 9                                                    | 1.510995                                | 1.535717 | 1.559323 | 1.582386 |
| 10                                                   | 1.510932                                | 1.536259 | 1.55703  | 1.5842   |
| 11                                                   | 1.510441                                | 1.537496 | 1.556026 | 1.586089 |
| 12                                                   | 1.509799                                | 1.537964 | 1.555979 | 1.585413 |
| 13                                                   | 1.509677                                | 1.538415 | 1.555988 | 1.584627 |
| 14                                                   | 1.50968                                 | 1.538048 | 1.556968 | 1.582526 |
| 15                                                   | 1.509617                                | 1.537064 | 1.558114 | 1.580889 |
| 16                                                   | 1.510499                                | 1.536226 | 1.559223 | 1.580369 |
| 17                                                   | 1.510937                                | 1.535512 | 1.558961 | 1.580101 |
| 18                                                   | 1.510993                                | 1.53542  | 1.558767 | 1.581874 |
| 19                                                   | 1.511044                                | 1.535832 | 1.557859 | 1.583081 |
| 20                                                   | 1.510705                                | 1.536908 | 1.55685  | 1.585254 |
| 21                                                   | 1.510252                                | 1.537805 | 1.555782 | 1.586178 |
| 22                                                   | 1.509788                                | 1.538096 | 1.555675 | 1.584613 |
| 23                                                   | 1.509627                                | 1.538183 | 1.556065 | 1.584178 |
| 24                                                   | 1.509552                                | 1.538038 | 1.556935 | 1.583092 |
| 25                                                   | 1.509801                                | 1.537355 | 1.558692 | 1.580212 |
| 26                                                   | 1.510412                                | 1.536192 | 1.559387 | 1.580601 |
| 27                                                   | 1.510842                                | 1.535692 | 1.55925  | 1.580953 |
| 28                                                   | 1.510901                                | 1.535576 | 1.559421 | 1.580069 |
| 29                                                   | 1.511265                                | 1.535745 | 1.559216 | 1.582488 |
| 30                                                   | 1.511046                                | 1.535989 | 1.558145 | 1.584278 |
| 31                                                   | 1.510843                                | 1.53697  | 1.557211 | 1.585472 |
| 32                                                   | 1.510594                                | 1.537627 | 1.55607  | 1.58614  |

|    |          |          |          |          |
|----|----------|----------|----------|----------|
| 33 | 1.510041 | 1.538226 | 1.555857 | 1.585383 |
| 34 | 1.509694 | 1.538213 | 1.555521 | 1.585469 |
| 35 | 1.509736 | 1.538244 | 1.556328 | 1.58387  |
| 36 | 1.50999  | 1.53848  | 1.557329 | 1.58273  |
| 37 | 1.50979  | 1.537568 | 1.558513 | 1.581153 |
| 38 | 1.510378 | 1.536997 | 1.55927  | 1.580844 |
| 39 | 1.510768 | 1.535941 | 1.559234 | 1.580784 |
| 40 | 1.510941 | 1.535885 | 1.560052 | 1.580772 |
| 41 | 1.511251 | 1.535726 | 1.559252 | 1.582492 |
| 42 | 1.511517 | 1.536231 | 1.559201 | 1.584074 |
| 43 | 1.511069 | 1.536283 | 1.558178 | 1.584778 |
| 44 | 1.510987 | 1.53749  | 1.557131 | 1.586642 |
| 45 | 1.510415 | 1.538216 | 1.556244 | 1.585881 |
| 46 | 1.510064 | 1.538383 | 1.556127 | 1.586927 |
| 47 | 1.51004  | 1.53862  | 1.556397 | 1.586295 |
| 48 | 1.509999 | 1.538818 | 1.556885 | 1.584369 |
| 49 | 1.50989  | 1.538084 | 1.557741 | 1.583325 |
| 50 | 1.510113 | 1.537828 | 1.559432 | 1.583186 |
| 51 | 1.510355 | 1.537375 | 1.559958 | 1.581058 |
| 52 | 1.510964 | 1.536241 | 1.560199 | 1.582453 |
| 53 | 1.511482 | 1.536355 | 1.560298 | 1.581636 |
| 54 | 1.511457 | 1.536245 | 1.560373 | 1.581716 |
| 55 | 1.511498 | 1.53622  | 1.559432 | 1.58437  |
| 56 | 1.511694 | 1.536929 | 1.55881  | 1.584836 |
| 57 | 1.511159 | 1.537127 | 1.558346 | 1.585259 |
| 58 | 1.510897 | 1.538073 | 1.556488 | 1.587404 |
| 59 | 1.510645 | 1.538607 | 1.556723 | 1.58645  |
| 60 | 1.510205 | 1.538954 | 1.556703 | 1.586294 |
| 61 | 1.510136 | 1.539105 | 1.556745 | 1.58709  |
| 62 | 1.510185 | 1.539123 | 1.557726 | 1.584779 |
| 63 | 1.510124 | 1.538291 | 1.558277 | 1.582978 |
| 64 | 1.510317 | 1.538147 | 1.559135 | 1.582766 |
| 65 | 1.510702 | 1.537628 | 1.560273 | 1.581476 |
| 66 | 1.51134  | 1.536757 | 1.560742 | 1.581715 |
| 67 | 1.511595 | 1.536552 | 1.560769 | 1.582886 |

|     |          |          |          |          |
|-----|----------|----------|----------|----------|
| 68  | 1.511849 | 1.537028 | 1.561164 | 1.582415 |
| 69  | 1.51196  | 1.5369   | 1.5607   | 1.584016 |
| 70  | 1.5117   | 1.536837 | 1.559174 | 1.585305 |
| 71  | 1.511878 | 1.537049 | 1.559534 | 1.585421 |
| 72  | 1.511793 | 1.537579 | 1.559043 | 1.587039 |
| 73  | 1.511387 | 1.538324 | 1.558234 | 1.58732  |
| 74  | 1.511331 | 1.539201 | 1.558262 | 1.587333 |
| 75  | 1.510925 | 1.538977 | 1.557824 | 1.587905 |
| 76  | 1.510582 | 1.539336 | 1.55709  | 1.587497 |
| 77  | 1.510295 | 1.539543 | 1.557345 | 1.586199 |
| 78  | 1.51049  | 1.539665 | 1.557596 | 1.5876   |
| 79  | 1.510406 | 1.539605 | 1.55818  | 1.586629 |
| 80  | 1.510468 | 1.539391 | 1.559016 | 1.584847 |
| 81  | 1.510663 | 1.539075 | 1.559138 | 1.583952 |
| 82  | 1.510749 | 1.538967 | 1.559901 | 1.584137 |
| 83  | 1.510854 | 1.538722 | 1.56064  | 1.582939 |
| 84  | 1.511109 | 1.538382 | 1.561169 | 1.58353  |
| 85  | 1.511539 | 1.53791  | 1.561881 | 1.583041 |
| 86  | 1.51174  | 1.538018 | 1.561955 | 1.583632 |
| 87  | 1.51208  | 1.537391 | 1.561604 | 1.583704 |
| 88  | 1.512206 | 1.53753  | 1.561854 | 1.583889 |
| 89  | 1.512182 | 1.537633 | 1.561596 | 1.584105 |
| 90  | 1.512353 | 1.537751 | 1.561801 | 1.585078 |
| 91  | 1.512407 | 1.537749 | 1.561151 | 1.585567 |
| 92  | 1.51223  | 1.537783 | 1.560932 | 1.587939 |
| 93  | 1.512278 | 1.537882 | 1.559879 | 1.587351 |
| 94  | 1.512193 | 1.538488 | 1.559729 | 1.587966 |
| 95  | 1.511923 | 1.538956 | 1.558947 | 1.588822 |
| 96  | 1.51157  | 1.539713 | 1.558409 | 1.588879 |
| 97  | 1.511568 | 1.540192 | 1.558721 | 1.588802 |
| 98  | 1.511242 | 1.540303 | 1.558591 | 1.589252 |
| 99  | 1.511131 | 1.540464 | 1.558671 | 1.58818  |
| 100 | 1.510264 | 1.538137 | 1.559907 | 1.583268 |

| $\text{Fe}_{0.2}\text{Ni}_{0.8}\text{O}_x\text{H}_y$ | Current density ( $\text{mA cm}^{-2}$ ) |          |          |          |
|------------------------------------------------------|-----------------------------------------|----------|----------|----------|
| Measurements                                         | 1                                       | 5        | 10       | 20       |
| 1                                                    | 1.512921                                | 1.547088 | 1.57227  | 1.604732 |
| 2                                                    | 1.51313                                 | 1.549014 | 1.572701 | 1.605135 |
| 3                                                    | 1.5131                                  | 1.54967  | 1.571678 | 1.60544  |
| 4                                                    | 1.512271                                | 1.550646 | 1.571237 | 1.60422  |
| 5                                                    | 1.512146                                | 1.551244 | 1.570893 | 1.606963 |
| 6                                                    | 1.512278                                | 1.5512   | 1.571271 | 1.609477 |
| 7                                                    | 1.512093                                | 1.550869 | 1.572387 | 1.611552 |
| 8                                                    | 1.512149                                | 1.550616 | 1.573533 | 1.611734 |
| 9                                                    | 1.512522                                | 1.549946 | 1.574472 | 1.61277  |
| 10                                                   | 1.512911                                | 1.548806 | 1.575606 | 1.612025 |
| 11                                                   | 1.513442                                | 1.548306 | 1.575807 | 1.611787 |
| 12                                                   | 1.51352                                 | 1.54823  | 1.575448 | 1.61039  |
| 13                                                   | 1.513562                                | 1.548314 | 1.574911 | 1.608369 |
| 14                                                   | 1.513483                                | 1.5485   | 1.574243 | 1.606035 |
| 15                                                   | 1.513395                                | 1.548956 | 1.573284 | 1.605955 |
| 16                                                   | 1.513071                                | 1.550006 | 1.571592 | 1.605562 |
| 17                                                   | 1.512496                                | 1.551076 | 1.571364 | 1.604959 |
| 18                                                   | 1.512269                                | 1.551186 | 1.57119  | 1.606545 |
| 19                                                   | 1.512141                                | 1.551147 | 1.571567 | 1.607953 |
| 20                                                   | 1.512169                                | 1.551265 | 1.571555 | 1.609979 |
| 21                                                   | 1.512176                                | 1.550854 | 1.572109 | 1.611555 |
| 22                                                   | 1.512457                                | 1.550051 | 1.573835 | 1.613111 |
| 23                                                   | 1.512618                                | 1.549547 | 1.574976 | 1.612808 |
| 24                                                   | 1.513108                                | 1.548881 | 1.575414 | 1.613172 |
| 25                                                   | 1.515229                                | 1.54761  | 1.575824 | 1.612101 |
| 26                                                   | 1.513698                                | 1.548409 | 1.575619 | 1.610647 |
| 27                                                   | 1.515483                                | 1.547433 | 1.575319 | 1.609119 |
| 28                                                   | 1.513621                                | 1.54841  | 1.574357 | 1.606028 |
| 29                                                   | 1.513909                                | 1.548814 | 1.574068 | 1.606747 |
| 30                                                   | 1.513409                                | 1.549336 | 1.573004 | 1.60648  |
| 31                                                   | 1.513207                                | 1.55029  | 1.571868 | 1.606095 |
| 32                                                   | 1.51262                                 | 1.551023 | 1.571444 | 1.605894 |

|    |          |          |          |          |
|----|----------|----------|----------|----------|
| 33 | 1.512475 | 1.55096  | 1.571468 | 1.606809 |
| 34 | 1.512198 | 1.551381 | 1.571172 | 1.607996 |
| 35 | 1.512163 | 1.551388 | 1.571107 | 1.609734 |
| 36 | 1.51223  | 1.550915 | 1.571999 | 1.61092  |
| 37 | 1.512167 | 1.550641 | 1.573308 | 1.611863 |
| 38 | 1.512401 | 1.550065 | 1.574318 | 1.612733 |
| 39 | 1.512859 | 1.549107 | 1.574851 | 1.61275  |
| 40 | 1.513505 | 1.548215 | 1.576075 | 1.611489 |
| 41 | 1.513505 | 1.548407 | 1.575731 | 1.612153 |
| 42 | 1.513799 | 1.547993 | 1.575436 | 1.610088 |
| 43 | 1.51373  | 1.548491 | 1.574563 | 1.606895 |
| 44 | 1.513649 | 1.54857  | 1.573514 | 1.606512 |
| 45 | 1.513354 | 1.549563 | 1.57218  | 1.605742 |
| 46 | 1.512835 | 1.550722 | 1.571513 | 1.604803 |
| 47 | 1.512425 | 1.550993 | 1.571026 | 1.606402 |
| 48 | 1.512308 | 1.550948 | 1.570826 | 1.608015 |
| 49 | 1.51223  | 1.550897 | 1.57142  | 1.609871 |
| 50 | 1.51258  | 1.550741 | 1.57237  | 1.611426 |
| 51 | 1.512459 | 1.550057 | 1.573784 | 1.612475 |
| 52 | 1.51305  | 1.549073 | 1.574955 | 1.612494 |
| 53 | 1.513479 | 1.548274 | 1.575782 | 1.612298 |
| 54 | 1.513648 | 1.547907 | 1.575261 | 1.611092 |
| 55 | 1.513652 | 1.548331 | 1.574548 | 1.607065 |
| 56 | 1.51343  | 1.548958 | 1.572722 | 1.605875 |
| 57 | 1.513104 | 1.549855 | 1.571178 | 1.606195 |
| 58 | 1.512484 | 1.550841 | 1.570905 | 1.606161 |
| 59 | 1.51222  | 1.551085 | 1.570753 | 1.607903 |
| 60 | 1.512207 | 1.550617 | 1.571271 | 1.611701 |
| 61 | 1.512256 | 1.550131 | 1.573131 | 1.611497 |
| 62 | 1.512872 | 1.549076 | 1.57485  | 1.61197  |
| 63 | 1.513415 | 1.54803  | 1.575475 | 1.611625 |
| 64 | 1.513694 | 1.54796  | 1.574886 | 1.609384 |
| 65 | 1.513724 | 1.548071 | 1.573855 | 1.606465 |
| 66 | 1.513482 | 1.548512 | 1.572543 | 1.605125 |
| 67 | 1.512702 | 1.550312 | 1.570546 | 1.604325 |



|     |          |          |          |          |
|-----|----------|----------|----------|----------|
| 68  | 1.512227 | 1.550872 | 1.569876 | 1.606281 |
| 69  | 1.512186 | 1.550627 | 1.570977 | 1.608983 |
| 70  | 1.512261 | 1.550043 | 1.572842 | 1.610747 |
| 71  | 1.513108 | 1.548701 | 1.574493 | 1.611708 |
| 72  | 1.513323 | 1.547673 | 1.575083 | 1.609758 |
| 73  | 1.513537 | 1.547824 | 1.574245 | 1.608156 |
| 74  | 1.513584 | 1.547998 | 1.572521 | 1.605415 |
| 75  | 1.512939 | 1.549947 | 1.570708 | 1.604266 |
| 76  | 1.512139 | 1.550514 | 1.569934 | 1.605486 |
| 77  | 1.512264 | 1.550382 | 1.570437 | 1.609664 |
| 78  | 1.512356 | 1.549434 | 1.573075 | 1.609474 |
| 79  | 1.513008 | 1.548047 | 1.574516 | 1.611686 |
| 80  | 1.513698 | 1.547537 | 1.5748   | 1.609331 |
| 81  | 1.513579 | 1.547672 | 1.573377 | 1.605532 |
| 82  | 1.513152 | 1.549159 | 1.571036 | 1.604352 |
| 83  | 1.512391 | 1.550175 | 1.569878 | 1.604769 |
| 84  | 1.51213  | 1.550154 | 1.569872 | 1.60799  |
| 85  | 1.512258 | 1.549645 | 1.572116 | 1.610032 |
| 86  | 1.513139 | 1.547701 | 1.574171 | 1.611214 |
| 87  | 1.513541 | 1.547226 | 1.574516 | 1.608818 |
| 88  | 1.513622 | 1.547637 | 1.572906 | 1.604572 |
| 89  | 1.513088 | 1.549067 | 1.570144 | 1.604107 |
| 90  | 1.512536 | 1.550333 | 1.569981 | 1.6038   |
| 91  | 1.512134 | 1.550176 | 1.570354 | 1.608832 |
| 92  | 1.512736 | 1.548551 | 1.573319 | 1.610859 |
| 93  | 1.513429 | 1.547525 | 1.574346 | 1.609194 |
| 94  | 1.513499 | 1.547288 | 1.573234 | 1.604604 |
| 95  | 1.513287 | 1.548522 | 1.570783 | 1.603313 |
| 96  | 1.512233 | 1.550173 | 1.569625 | 1.603831 |
| 97  | 1.512071 | 1.549869 | 1.569969 | 1.608484 |
| 98  | 1.512762 | 1.54814  | 1.573114 | 1.610702 |
| 99  | 1.513444 | 1.547119 | 1.573811 | 1.608697 |
| 100 | 1.514215 | 1.543896 | 1.570485 | 1.602227 |

| $\text{Fe}_{0.3}\text{Ni}_{0.7}\text{O}_x\text{H}_y$ | Current density ( $\text{mA cm}^{-2}$ ) |          |          |          |
|------------------------------------------------------|-----------------------------------------|----------|----------|----------|
| Measurements                                         | 1                                       | 5        | 10       | 20       |
| 1                                                    | 1.561513                                | 1.646772 | 1.718274 | 1.704118 |
| 2                                                    | 1.561795                                | 1.647021 | 1.718066 | 1.797451 |
| 3                                                    | 1.561754                                | 1.64682  | 1.718066 | 1.797451 |
| 4                                                    | 1.561934                                | 1.647153 | 1.716877 | 1.797059 |
| 5                                                    | 1.560155                                | 1.650595 | 1.716583 | 1.803469 |
| 6                                                    | 1.560238                                | 1.650448 | 1.716373 | 1.803061 |
| 7                                                    | 1.560214                                | 1.650824 | 1.716667 | 1.802653 |
| 8                                                    | 1.56021                                 | 1.650672 | 1.717857 | 1.8      |
| 9                                                    | 1.560497                                | 1.651061 | 1.716456 | 1.7992   |
| 10                                                   | 1.560669                                | 1.651061 | 1.716162 | 1.802245 |
| 11                                                   | 1.560446                                | 1.650451 | 1.718346 | 1.7988   |
| 12                                                   | 1.560871                                | 1.650758 | 1.716837 | 1.7988   |
| 13                                                   | 1.560642                                | 1.651217 | 1.718041 | 1.7988   |
| 14                                                   | 1.560605                                | 1.651212 | 1.717048 | 1.802245 |
| 15                                                   | 1.560832                                | 1.651379 | 1.718135 | 1.801837 |
| 16                                                   | 1.560984                                | 1.651231 | 1.716327 | 1.801429 |
| 17                                                   | 1.561255                                | 1.653557 | 1.718848 | 1.801429 |
| 18                                                   | 1.562908                                | 1.647794 | 1.718848 | 1.80102  |
| 19                                                   | 1.563006                                | 1.648007 | 1.718229 | 1.80102  |
| 20                                                   | 1.562832                                | 1.648364 | 1.71701  | 1.80102  |
| 21                                                   | 1.563006                                | 1.64829  | 1.71701  | 1.80102  |
| 22                                                   | 1.56331                                 | 1.648507 | 1.718635 | 1.800612 |
| 23                                                   | 1.563286                                | 1.648148 | 1.71671  | 1.80102  |
| 24                                                   | 1.563091                                | 1.648074 | 1.718947 | 1.800612 |
| 25                                                   | 1.563104                                | 1.648148 | 1.717617 | 1.80102  |
| 26                                                   | 1.563193                                | 1.648216 | 1.718635 | 1.800612 |
| 27                                                   | 1.563441                                | 1.648141 | 1.717708 | 1.800612 |
| 28                                                   | 1.613184                                | 1.648642 | 1.717188 | 1.799796 |
| 29                                                   | 1.61307                                 | 1.648496 | 1.717801 | 1.799796 |
| 30                                                   | 1.613387                                | 1.648277 | 1.71811  | 1.799796 |
| 31                                                   | 1.613413                                | 1.648134 | 1.719048 | 1.803333 |
| 32                                                   | 1.613413                                | 1.648792 | 1.717493 | 1.799796 |

|    |          |          |          |          |
|----|----------|----------|----------|----------|
| 33 | 1.613529 | 1.648717 | 1.717493 | 1.799796 |
| 34 | 1.613488 | 1.648935 | 1.717585 | 1.714694 |
| 35 | 1.613328 | 1.649008 | 1.716971 | 1.71625  |
| 36 | 1.613714 | 1.649084 | 1.717277 | 1.714694 |
| 37 | 1.613455 | 1.648855 | 1.658995 | 1.71449  |
| 38 | 1.613481 | 1.648931 | 1.659467 | 1.71449  |
| 39 | 1.613507 | 1.649234 | 1.659626 | 1.71449  |
| 40 | 1.613409 | 1.648931 | 1.659467 | 1.71449  |
| 41 | 1.613435 | 1.649008 | 1.659626 | 1.71449  |
| 42 | 1.613735 | 1.649157 | 1.658839 | 1.716042 |
| 43 | 1.613501 | 1.64969  | 1.659358 | 1.715833 |
| 44 | 1.613293 | 1.649154 | 1.659517 | 1.715833 |
| 45 | 1.613375 | 1.649535 | 1.658886 | 1.715833 |
| 46 | 1.613605 | 1.649    | 1.6592   | 1.714286 |
| 47 | 1.613531 | 1.649457 | 1.660054 | 1.715625 |
| 48 | 1.613485 | 1.649305 | 1.6592   | 1.717447 |
| 49 | 1.611697 | 1.652996 | 1.659892 | 1.715625 |
| 50 | 1.613521 | 1.649305 | 1.65973  | 1.714082 |
| 51 | 1.613715 | 1.649457 | 1.658421 | 1.715833 |
| 52 | 1.613599 | 1.649455 | 1.659249 | 1.715625 |
| 53 | 1.613636 | 1.649688 | 1.659091 | 1.715417 |
| 54 | 1.614446 | 1.653443 | 1.659783 | 1.715417 |
| 55 | 1.613822 | 1.649455 | 1.659249 | 1.718696 |
| 56 | 1.613748 | 1.649455 | 1.660274 | 1.720444 |
| 57 | 1.613636 | 1.649688 | 1.659091 | 1.720667 |
| 58 | 1.613525 | 1.649455 | 1.660109 | 1.718696 |
| 59 | 1.613908 | 1.649609 | 1.659946 | 1.720444 |
| 60 | 1.61386  | 1.649922 | 1.658777 | 1.720444 |
| 61 | 1.613882 | 1.6493   | 1.659946 | 1.720444 |
| 62 | 1.613845 | 1.649765 | 1.659621 | 1.720222 |
| 63 | 1.613819 | 1.649921 | 1.658981 | 1.720222 |
| 64 | 1.614057 | 1.650079 | 1.659836 | 1.715    |
| 65 | 1.613943 | 1.650079 | 1.659836 | 1.72     |
| 66 | 1.613879 | 1.65     | 1.659511 | 1.716596 |
| 67 | 1.613803 | 1.65     | 1.659511 | 1.716596 |

|     |          |          |          |          |
|-----|----------|----------|----------|----------|
| 68  | 1.613917 | 1.650238 | 1.660894 | 1.716596 |
| 69  | 1.614119 | 1.649921 | 1.659511 | 1.716596 |
| 70  | 1.613967 | 1.650159 | 1.659189 | 1.715    |
| 71  | 1.61394  | 1.65056  | 1.660055 | 1.716596 |
| 72  | 1.613891 | 1.650398 | 1.659189 | 1.716596 |
| 73  | 1.614041 | 1.650159 | 1.659563 | 1.719778 |
| 74  | 1.613887 | 1.6504   | 1.659563 | 1.716383 |
| 75  | 1.614129 | 1.65032  | 1.659945 | 1.71617  |
| 76  | 1.613976 | 1.650482 | 1.659079 | 1.71617  |
| 77  | 1.614104 | 1.650402 | 1.660111 | 1.71617  |
| 78  | 1.614195 | 1.650402 | 1.65978  | 1.717826 |
| 79  | 1.614234 | 1.650726 | 1.659615 | 1.71617  |
| 80  | 1.614104 | 1.675526 | 1.65978  | 1.717826 |
| 81  | 1.614207 | 1.675163 | 1.66     | 1.715957 |
| 82  | 1.614117 | 1.674967 | 1.659945 | 1.71617  |
| 83  | 1.614286 | 1.675329 | 1.659452 | 1.717826 |
| 84  | 1.614286 | 1.675479 | 1.659128 | 1.715957 |
| 85  | 1.614156 | 1.675049 | 1.659615 | 1.71617  |
| 86  | 1.614246 | 1.675395 | 1.66     | 1.719111 |
| 87  | 1.61401  | 1.675347 | 1.659504 | 1.721136 |
| 88  | 1.614299 | 1.675281 | 1.659178 | 1.717609 |
| 89  | 1.61414  | 1.675629 | 1.659504 | 1.8296   |
| 90  | 1.614062 | 1.675629 | 1.659669 | 1.8296   |
| 91  | 1.614206 | 1.675149 | 1.660224 | 1.832857 |
| 92  | 1.614486 | 1.675298 | 1.660056 | 1.8296   |
| 93  | 1.614193 | 1.675017 | 1.660224 | 1.832857 |
| 94  | 1.614538 | 1.675298 | 1.660224 | 1.832449 |
| 95  | 1.614393 | 1.675667 | 1.659722 | 1.719111 |
| 96  | 1.614259 | 1.675395 | 1.659392 | 1.8292   |
| 97  | 1.614272 | 1.675953 | 1.659392 | 1.832449 |
| 98  | 1.614313 | 1.675819 | 1.660795 | 1.8288   |
| 99  | 1.614272 | 1.676216 | 1.660282 | 1.8288   |
| 100 | 1.614615 | 1.675133 | 1.659669 | 1.8288   |

| $\text{Fe}_{0.5}\text{Ni}_{0.5}\text{O}_x\text{H}_y$ | Current density ( $\text{mA cm}^{-2}$ ) |          |          |          |
|------------------------------------------------------|-----------------------------------------|----------|----------|----------|
| Measurements                                         | 1                                       | 5        | 10       | 20       |
| 1                                                    | 1.544592                                | 1.582123 | 1.604774 | 1.638813 |
| 2                                                    | 1.545288                                | 1.582788 | 1.606574 | 1.639355 |
| 3                                                    | 1.546719                                | 1.581975 | 1.60755  | 1.64247  |
| 4                                                    | 1.546562                                | 1.583067 | 1.607101 | 1.643405 |
| 5                                                    | 1.545129                                | 1.583665 | 1.606962 | 1.64201  |
| 6                                                    | 1.545003                                | 1.581384 | 1.605766 | 1.63912  |
| 7                                                    | 1.54484                                 | 1.581824 | 1.605657 | 1.639223 |
| 8                                                    | 1.544864                                | 1.583557 | 1.606342 | 1.639149 |
| 9                                                    | 1.54522                                 | 1.582962 | 1.607057 | 1.640765 |
| 10                                                   | 1.545555                                | 1.582846 | 1.606832 | 1.64055  |
| 11                                                   | 1.544979                                | 1.583128 | 1.60603  | 1.640769 |
| 12                                                   | 1.5454                                  | 1.583188 | 1.606788 | 1.639684 |
| 13                                                   | 1.54534                                 | 1.582389 | 1.606351 | 1.6399   |
| 14                                                   | 1.545381                                | 1.584243 | 1.606931 | 1.640728 |
| 15                                                   | 1.546989                                | 1.583215 | 1.607548 | 1.640758 |
| 16                                                   | 1.547118                                | 1.583038 | 1.608279 | 1.642117 |
| 17                                                   | 1.545552                                | 1.584232 | 1.607414 | 1.641397 |
| 18                                                   | 1.547075                                | 1.583582 | 1.607698 | 1.640703 |
| 19                                                   | 1.547263                                | 1.583266 | 1.608339 | 1.641823 |
| 20                                                   | 1.547354                                | 1.584005 | 1.608244 | 1.643168 |
| 21                                                   | 1.547168                                | 1.583791 | 1.608515 | 1.641679 |
| 22                                                   | 1.547413                                | 1.583448 | 1.60865  | 1.642105 |
| 23                                                   | 1.545291                                | 1.583669 | 1.607281 | 1.642229 |
| 24                                                   | 1.545734                                | 1.583809 | 1.606792 | 1.639624 |
| 25                                                   | 1.545742                                | 1.583527 | 1.607679 | 1.640586 |
| 26                                                   | 1.545413                                | 1.584108 | 1.607374 | 1.641575 |
| 27                                                   | 1.545964                                | 1.584335 | 1.607495 | 1.641324 |
| 28                                                   | 1.54625                                 | 1.584923 | 1.609526 | 1.643834 |
| 29                                                   | 1.545834                                | 1.585452 | 1.608973 | 1.64354  |
| 30                                                   | 1.546103                                | 1.585007 | 1.608922 | 1.642445 |
| 31                                                   | 1.546264                                | 1.585191 | 1.609856 | 1.64391  |
| 32                                                   | 1.545903                                | 1.585897 | 1.609036 | 1.643504 |

|    |          |          |          |          |
|----|----------|----------|----------|----------|
| 33 | 1.546383 | 1.585396 | 1.609599 | 1.642797 |
| 34 | 1.546362 | 1.58572  | 1.610283 | 1.644239 |
| 35 | 1.546052 | 1.58579  | 1.609161 | 1.643226 |
| 36 | 1.547813 | 1.583909 | 1.609171 | 1.642792 |
| 37 | 1.546088 | 1.585009 | 1.608954 | 1.643281 |
| 38 | 1.547698 | 1.584753 | 1.608848 | 1.64211  |
| 39 | 1.546721 | 1.586115 | 1.61095  | 1.645325 |
| 40 | 1.546406 | 1.58681  | 1.611019 | 1.645053 |
| 41 | 1.54673  | 1.586561 | 1.610365 | 1.644466 |
| 42 | 1.54661  | 1.58554  | 1.610354 | 1.644528 |
| 43 | 1.54638  | 1.586336 | 1.609418 | 1.643871 |
| 44 | 1.546781 | 1.585992 | 1.610339 | 1.644091 |
| 45 | 1.546556 | 1.586251 | 1.610698 | 1.644707 |
| 46 | 1.546514 | 1.586395 | 1.609865 | 1.643085 |
| 47 | 1.546763 | 1.585519 | 1.610841 | 1.644615 |
| 48 | 1.546534 | 1.586557 | 1.610163 | 1.644588 |
| 49 | 1.546725 | 1.585633 | 1.610056 | 1.642559 |
| 50 | 1.546625 | 1.586011 | 1.610798 | 1.645762 |
| 51 | 1.546623 | 1.586559 | 1.609938 | 1.643614 |
| 52 | 1.546793 | 1.586348 | 1.611218 | 1.644753 |
| 53 | 1.546705 | 1.586552 | 1.610259 | 1.644487 |
| 54 | 1.546752 | 1.586063 | 1.610285 | 1.643525 |
| 55 | 1.546803 | 1.586501 | 1.610939 | 1.64465  |
| 56 | 1.54691  | 1.586847 | 1.610617 | 1.64394  |
| 57 | 1.547038 | 1.586567 | 1.610959 | 1.645054 |
| 58 | 1.546821 | 1.586839 | 1.610271 | 1.644243 |
| 59 | 1.547107 | 1.586339 | 1.611026 | 1.643417 |
| 60 | 1.546889 | 1.586998 | 1.611416 | 1.645472 |
| 61 | 1.547134 | 1.586938 | 1.610762 | 1.645447 |
| 62 | 1.547231 | 1.586919 | 1.611591 | 1.645983 |
| 63 | 1.546834 | 1.587105 | 1.610432 | 1.644846 |
| 64 | 1.547099 | 1.586072 | 1.611141 | 1.644944 |
| 65 | 1.54686  | 1.587009 | 1.610633 | 1.645988 |
| 66 | 1.547318 | 1.58704  | 1.611598 | 1.644634 |
| 67 | 1.547117 | 1.58756  | 1.611476 | 1.64614  |

|     |          |          |          |          |
|-----|----------|----------|----------|----------|
| 68  | 1.547232 | 1.587547 | 1.611405 | 1.645715 |
| 69  | 1.547373 | 1.587434 | 1.611932 | 1.646367 |
| 70  | 1.547083 | 1.587327 | 1.610893 | 1.645324 |
| 71  | 1.547443 | 1.58694  | 1.611891 | 1.645707 |
| 72  | 1.547088 | 1.587706 | 1.611365 | 1.646001 |
| 73  | 1.547625 | 1.587407 | 1.611561 | 1.64536  |
| 74  | 1.54733  | 1.586905 | 1.611564 | 1.646105 |
| 75  | 1.547096 | 1.58711  | 1.61063  | 1.644061 |
| 76  | 1.547384 | 1.586229 | 1.610889 | 1.645113 |
| 77  | 1.547151 | 1.587283 | 1.610785 | 1.644768 |
| 78  | 1.547458 | 1.58678  | 1.611039 | 1.644575 |
| 79  | 1.547095 | 1.587021 | 1.610802 | 1.645153 |
| 80  | 1.547387 | 1.58725  | 1.611313 | 1.644277 |
| 81  | 1.54766  | 1.58776  | 1.61217  | 1.646893 |
| 82  | 1.547398 | 1.587977 | 1.611721 | 1.644798 |
| 83  | 1.547888 | 1.587719 | 1.612835 | 1.647039 |
| 84  | 1.547772 | 1.588647 | 1.612119 | 1.646311 |
| 85  | 1.547713 | 1.587708 | 1.612904 | 1.646767 |
| 86  | 1.547837 | 1.588387 | 1.611759 | 1.646719 |
| 87  | 1.548166 | 1.587933 | 1.612497 | 1.646445 |
| 88  | 1.547853 | 1.588784 | 1.613097 | 1.647661 |
| 89  | 1.547737 | 1.588818 | 1.612608 | 1.646646 |
| 90  | 1.548082 | 1.58847  | 1.613051 | 1.647997 |
| 91  | 1.547965 | 1.588816 | 1.612569 | 1.646188 |
| 92  | 1.547986 | 1.588256 | 1.613409 | 1.646753 |
| 93  | 1.547935 | 1.588402 | 1.611855 | 1.646329 |
| 94  | 1.548039 | 1.587714 | 1.612343 | 1.645601 |
| 95  | 1.547516 | 1.588053 | 1.611642 | 1.64604  |
| 96  | 1.547785 | 1.588255 | 1.611817 | 1.644988 |
| 97  | 1.547721 | 1.58787  | 1.612056 | 1.646141 |
| 98  | 1.547612 | 1.588316 | 1.611529 | 1.645174 |
| 99  | 1.547814 | 1.587698 | 1.612035 | 1.646813 |
| 100 | 1.549148 | 1.585754 | 1.610094 | 1.644365 |

| $\text{Fe}_{0.7}\text{Ni}_{0.3}\text{O}_x\text{H}_y$ | Current density ( $\text{mA cm}^{-2}$ ) |          |          |          |
|------------------------------------------------------|-----------------------------------------|----------|----------|----------|
| Measurements                                         | 1                                       | 5        | 10       | 20       |
| 1                                                    | 1.540909                                | 1.576629 | 1.64489  | 1.641155 |
| 2                                                    | 1.544271                                | 1.594032 | 1.599269 | 1.639987 |
| 3                                                    | 1.545619                                | 1.586337 | 1.629124 | 1.651598 |
| 4                                                    | 1.54414                                 | 1.583544 | 1.636243 | 1.647516 |
| 5                                                    | 1.5447                                  | 1.595139 | 1.602953 | 1.651362 |
| 6                                                    | 1.544623                                | 1.584831 | 1.619468 | 1.596142 |
| 7                                                    | 1.544357                                | 1.579724 | 1.614285 | 1.648566 |
| 8                                                    | 1.541742                                | 1.584982 | 1.627098 | 1.641655 |
| 9                                                    | 1.542222                                | 1.595456 | 1.606757 | 1.652474 |
| 10                                                   | 1.546576                                | 1.582933 | 1.707273 | 2.12255  |
| 11                                                   | 1.543267                                | 1.595503 | 1.62843  | 1.654731 |
| 12                                                   | 1.544126                                | 1.609178 | 1.590075 | 1.640472 |
| 13                                                   | 1.5422                                  | 1.583608 | 1.681338 | 1.662772 |
| 14                                                   | 1.543843                                | 1.584322 | 1.619454 | 1.654868 |
| 15                                                   | 1.542845                                | 1.599968 | 1.595694 | 1.658088 |
| 16                                                   | 1.539586                                | 1.579967 | 1.657662 | 1.610381 |
| 17                                                   | 1.54093                                 | 1.579479 | 1.641436 | 1.677062 |
| 18                                                   | 1.54273                                 | 1.582568 | 1.616629 | 1.650387 |
| 19                                                   | 1.542472                                | 1.605482 | 1.603486 | 1.614732 |
| 20                                                   | 1.542966                                | 1.586438 | 1.617328 | 1.665829 |
| 21                                                   | 1.541217                                | 1.578267 | 1.617917 | 1.620295 |
| 22                                                   | 1.54328                                 | 1.584709 | 1.598475 | 1.652141 |
| 23                                                   | 1.544108                                | 1.622135 | 1.596199 | 1.67101  |
| 24                                                   | 1.542154                                | 1.580321 | 1.60116  | 1.653167 |
| 25                                                   | 1.541747                                | 1.57943  | 1.618905 | 1.622376 |
| 26                                                   | 1.543928                                | 1.575548 | 1.627567 | 1.656801 |
| 27                                                   | 1.537675                                | 1.595379 | 1.605006 | 1.59916  |
| 28                                                   | 1.539453                                | 1.5896   | 1.630111 | 1.660848 |
| 29                                                   | 1.541657                                | 1.582806 | 1.628295 | 1.743021 |
| 30                                                   | 1.540038                                | 1.592006 | 1.613979 | 1.655154 |
| 31                                                   | 1.545352                                | 1.623207 | 1.599697 | 1.626354 |
| 32                                                   | 1.540271                                | 1.58647  | 1.595348 | 1.662098 |



|    |          |          |          |          |
|----|----------|----------|----------|----------|
| 33 | 1.539747 | 1.58145  | 1.626635 | 1.603138 |
| 34 | 1.545485 | 1.58937  | 1.59572  | 1.653138 |
| 35 | 1.543451 | 1.585248 | 1.592421 | 1.666106 |
| 36 | 1.538334 | 1.5855   | 1.637678 | 1.671375 |
| 37 | 1.541295 | 1.577166 | 1.610025 | 1.630677 |
| 38 | 1.542764 | 1.589778 | 1.596156 | 1.589956 |
| 39 | 1.53795  | 1.588054 | 1.621174 | 1.662129 |
| 40 | 1.538559 | 1.588884 | 1.744543 | 1.62508  |
| 41 | 1.539508 | 1.586498 | 1.633377 | 1.659161 |
| 42 | 1.540007 | 1.59027  | 1.599665 | 1.597781 |
| 43 | 1.539097 | 1.587875 | 1.594178 | 1.657733 |
| 44 | 1.539665 | 1.583486 | 1.630263 | 1.657379 |
| 45 | 1.542124 | 1.597536 | 1.597567 | 1.666938 |
| 46 | 1.539965 | 1.585045 | 1.586286 | 1.614646 |
| 47 | 1.537308 | 1.584043 | 1.616195 | 1.606416 |
| 48 | 1.539227 | 1.574718 | 1.614363 | 1.657555 |
| 49 | 1.538087 | 1.580933 | 1.596982 | 1.676066 |
| 50 | 1.537937 | 1.586955 | 1.62812  | 1.671039 |
| 51 | 1.537571 | 1.576396 | 1.61622  | 1.633128 |
| 52 | 1.538259 | 1.596679 | 1.604175 | 1.663236 |
| 53 | 1.539906 | 1.586555 | 1.636248 | 1.613348 |
| 54 | 1.539701 | 1.578961 | 1.629376 | 1.657317 |
| 55 | 1.538092 | 1.599644 | 1.607318 | 1.621726 |
| 56 | 1.538794 | 1.585218 | 1.629489 | 1.669567 |
| 57 | 1.539644 | 1.582092 | 1.608704 | 1.783201 |
| 58 | 1.540567 | 1.59008  | 1.595685 | 1.667052 |
| 59 | 1.542201 | 1.592583 | 1.620273 | 1.667269 |
| 60 | 1.538341 | 1.586502 | 1.64327  | 1.655825 |
| 61 | 1.541597 | 1.581103 | 1.609157 | 1.608597 |
| 62 | 1.541855 | 1.612491 | 1.59585  | 1.661422 |
| 63 | 1.538782 | 1.587041 | 1.724574 | 1.585059 |
| 64 | 1.538922 | 1.581537 | 1.62612  | 1.668113 |
| 65 | 1.539044 | 1.598584 | 1.592603 | 1.686659 |
| 66 | 1.539196 | 1.580866 | 1.622401 | 1.662197 |
| 67 | 1.537707 | 1.586979 | 1.629406 | 1.636891 |

|     |          |          |          |          |
|-----|----------|----------|----------|----------|
| 68  | 1.538804 | 1.56978  | 1.609572 | 1.668463 |
| 69  | 1.542091 | 1.582624 | 1.606597 | 1.588912 |
| 70  | 1.539092 | 1.603437 | 1.607108 | 1.657273 |
| 71  | 1.538089 | 1.586668 | 1.809726 | 1.634631 |
| 72  | 1.54113  | 1.582465 | 1.623502 | 1.659814 |
| 73  | 1.538026 | 1.608006 | 1.599387 | 1.743942 |
| 74  | 1.539162 | 1.588098 | 1.680685 | 1.670677 |
| 75  | 1.536418 | 1.58245  | 1.63404  | 1.624949 |
| 76  | 1.536548 | 1.589619 | 1.604319 | 1.669153 |
| 77  | 1.539627 | 1.588788 | 1.605151 | 1.642708 |
| 78  | 1.539672 | 1.590774 | 1.649726 | 1.6198   |
| 79  | 1.539908 | 1.583062 | 1.617673 | 1.65703  |
| 80  | 1.540095 | 1.597629 | 1.611539 | 1.709573 |
| 81  | 1.538328 | 1.588724 | 1.644023 | 1.659208 |
| 82  | 1.537672 | 1.582983 | 1.616528 | 1.646064 |
| 83  | 1.542095 | 1.590058 | 1.605335 | 1.658048 |
| 84  | 1.538586 | 1.621793 | 1.624288 | 1.595002 |
| 85  | 1.539298 | 1.590302 | 1.737252 | 1.669088 |
| 86  | 1.542212 | 1.584373 | 1.633437 | 1.683581 |
| 87  | 1.537925 | 1.630929 | 1.61119  | 1.641024 |
| 88  | 1.539067 | 1.592145 | 1.693232 | 1.662036 |
| 89  | 1.542526 | 1.583253 | 1.642133 | 1.597037 |
| 90  | 1.538045 | 1.596495 | 1.610516 | 1.655573 |
| 91  | 1.541489 | 1.593271 | 1.610892 | 1.701424 |
| 92  | 1.54062  | 1.586609 | 1.630409 | 1.665474 |
| 93  | 1.539475 | 1.587162 | 1.612712 | 1.636915 |
| 94  | 1.544352 | 1.604944 | 1.59786  | 1.662569 |
| 95  | 1.539683 | 1.586914 | 1.651167 | 1.618026 |
| 96  | 1.539513 | 1.586801 | 1.627673 | 1.659521 |
| 97  | 1.542603 | 1.596817 | 1.594624 | 1.7239   |
| 98  | 1.540798 | 1.589437 | 1.644134 | 1.677414 |
| 99  | 1.539307 | 1.587718 | 1.621878 | 1.64273  |
| 100 | 1.536141 | 1.596342 | 1.621777 | 1.670025 |

| $\text{FeO}_x\text{H}_y$ | Current density ( $\text{mA cm}^{-2}$ ) |          |          |          |
|--------------------------|-----------------------------------------|----------|----------|----------|
| Measurements             | 1                                       | 5        | 10       | 20       |
| 1                        | 1.719327                                | 1.775505 | 1.815462 | 1.882823 |
| 2                        | 1.723995                                | 1.782122 | 1.826549 | 1.881729 |
| 3                        | 1.728602                                | 1.787689 | 1.835652 | 1.889335 |
| 4                        | 1.730539                                | 1.788304 | 1.838137 | 1.899023 |
| 5                        | 1.734972                                | 1.793494 | 1.837285 | 1.909229 |
| 6                        | 1.738761                                | 1.80336  | 1.843091 | 1.916414 |
| 7                        | 1.745295                                | 1.805919 | 1.847215 | 1.912723 |
| 8                        | 1.746962                                | 1.810779 | 1.843966 | 1.912659 |
| 9                        | 1.746226                                | 1.809728 | 1.84636  | 1.921432 |
| 10                       | 1.748219                                | 1.809377 | 1.852374 | 1.919674 |
| 11                       | 1.750503                                | 1.813799 | 1.849547 | 1.916011 |
| 12                       | 1.749343                                | 1.814347 | 1.849249 | 1.924778 |
| 13                       | 1.750287                                | 1.812543 | 1.861112 | 1.925522 |
| 14                       | 1.753002                                | 1.816411 | 1.862439 | 1.919454 |
| 15                       | 1.752023                                | 1.817651 | 1.868247 | 1.927095 |
| 16                       | 1.751978                                | 1.815523 | 1.865489 | 1.929874 |
| 17                       | 1.754833                                | 1.818525 | 1.864428 | 1.923644 |
| 18                       | 1.755022                                | 1.820697 | 1.870166 | 1.928718 |
| 19                       | 1.754076                                | 1.818113 | 1.868934 | 1.933182 |
| 20                       | 1.756787                                | 1.820389 | 1.866484 | 1.926423 |
| 21                       | 1.757304                                | 1.823477 | 1.872224 | 1.92985  |
| 22                       | 1.7558                                  | 1.820458 | 1.871811 | 1.936524 |
| 23                       | 1.758365                                | 1.82211  | 1.868443 | 1.93008  |
| 24                       | 1.759083                                | 1.825785 | 1.873709 | 1.951854 |
| 25                       | 1.757745                                | 1.822965 | 1.874928 | 1.944116 |
| 26                       | 1.760128                                | 1.823638 | 1.871119 | 1.94833  |
| 27                       | 1.760903                                | 1.8281   | 1.875849 | 1.954048 |
| 28                       | 1.759266                                | 1.825417 | 1.877327 | 1.947242 |
| 29                       | 1.760454                                | 1.827149 | 1.873508 | 1.950835 |
| 30                       | 1.761777                                | 1.831433 | 1.877271 | 1.956928 |
| 31                       | 1.759854                                | 1.828917 | 1.87953  | 1.949432 |
| 32                       | 1.761989                                | 1.829252 | 1.875336 | 1.951624 |

|    |          |          |          |          |
|----|----------|----------|----------|----------|
| 33 | 1.763584 | 1.83351  | 1.879381 | 1.958986 |
| 34 | 1.762943 | 1.829398 | 1.881482 | 1.951301 |
| 35 | 1.764663 | 1.829268 | 1.877185 | 1.952737 |
| 36 | 1.766346 | 1.8337   | 1.880855 | 1.960513 |
| 37 | 1.764717 | 1.832012 | 1.883686 | 1.954325 |
| 38 | 1.766366 | 1.843691 | 1.878701 | 1.95487  |
| 39 | 1.766964 | 1.840426 | 1.882213 | 1.963187 |
| 40 | 1.765287 | 1.841691 | 1.885648 | 1.956637 |
| 41 | 1.76706  | 1.845379 | 1.880651 | 1.95748  |
| 42 | 1.768633 | 1.84204  | 1.883977 | 1.964401 |
| 43 | 1.766944 | 1.843244 | 1.886836 | 1.957501 |
| 44 | 1.768421 | 1.846213 | 1.88218  | 1.958852 |
| 45 | 1.770369 | 1.843304 | 1.886461 | 1.966099 |
| 46 | 1.768406 | 1.844507 | 1.888553 | 1.959794 |
| 47 | 1.770436 | 1.847852 | 1.883996 | 1.962358 |
| 48 | 1.771835 | 1.8443   | 1.888415 | 1.968063 |
| 49 | 1.770096 | 1.846237 | 1.890418 | 1.961478 |
| 50 | 1.772087 | 1.84907  | 1.885719 | 1.965219 |
| 51 | 1.773449 | 1.845836 | 1.890458 | 1.970071 |
| 52 | 1.771516 | 1.848649 | 1.897744 | 1.962875 |
| 53 | 1.774039 | 1.850391 | 1.903861 | 1.968101 |
| 54 | 1.774826 | 1.846863 | 1.900842 | 1.971691 |
| 55 | 1.77277  | 1.850332 | 1.899525 | 1.964943 |
| 56 | 1.776158 | 1.851352 | 1.905816 | 1.971777 |
| 57 | 1.775838 | 1.848203 | 1.901551 | 1.972502 |
| 58 | 1.774587 | 1.852235 | 1.902223 | 1.966619 |
| 59 | 1.778338 | 1.851853 | 1.906967 | 1.974881 |
| 60 | 1.776807 | 1.849565 | 1.902446 | 1.973812 |
| 61 | 1.784393 | 1.854398 | 1.906004 | 1.968958 |
| 62 | 1.782218 | 1.851842 | 1.90846  | 1.978313 |
| 63 | 1.784036 | 1.851569 | 1.903946 | 1.9732   |
| 64 | 1.78513  | 1.856142 | 1.9092   | 1.97299  |
| 65 | 1.783076 | 1.853116 | 1.910056 | 1.990004 |
| 66 | 1.785532 | 1.853783 | 1.905241 | 1.995335 |
| 67 | 1.786002 | 1.857602 | 1.911439 | 1.999697 |

|     |          |          |          |          |
|-----|----------|----------|----------|----------|
| 68  | 1.784088 | 1.85409  | 1.910732 | 1.99152  |
| 69  | 1.786889 | 1.856393 | 1.907226 | 1.999241 |
| 70  | 1.786331 | 1.858842 | 1.913897 | 2.000485 |
| 71  | 1.785115 | 1.855469 | 1.910219 | 1.99376  |
| 72  | 1.78801  | 1.858628 | 1.909666 | 2.002303 |
| 73  | 1.786201 | 1.859627 | 1.915955 | 1.999422 |
| 74  | 1.786366 | 1.85685  | 1.911007 | 1.996124 |
| 75  | 1.788916 | 1.86085  | 1.913263 | 2.00616  |
| 76  | 1.786921 | 1.860457 | 1.917348 | 1.999991 |
| 77  | 1.78789  | 1.858341 | 1.911882 | 1.999306 |
| 78  | 1.789663 | 1.863316 | 1.916207 | 2.008342 |
| 79  | 1.787722 | 1.860575 | 1.918679 | 2.000491 |
| 80  | 1.789565 | 1.860616 | 1.913915 | 2.004518 |
| 81  | 1.790649 | 1.865048 | 1.919126 | 2.010353 |
| 82  | 1.78859  | 1.861306 | 1.919626 | 2.002126 |
| 83  | 1.7913   | 1.86336  | 1.91569  | 2.008384 |
| 84  | 1.791157 | 1.866414 | 1.922161 | 2.012427 |
| 85  | 1.789611 | 1.862736 | 1.920336 | 2.005458 |
| 86  | 1.792578 | 1.866363 | 1.918632 | 2.013439 |
| 87  | 1.791031 | 1.867805 | 1.924934 | 2.011996 |
| 88  | 1.791443 | 1.864592 | 1.920375 | 2.007663 |
| 89  | 1.793883 | 1.868942 | 1.922329 | 2.017763 |
| 90  | 1.791551 | 1.86844  | 1.927139 | 2.011375 |
| 91  | 1.792916 | 1.866164 | 1.922176 | 2.011421 |
| 92  | 1.795001 | 1.871189 | 1.925865 | 2.020588 |
| 93  | 1.792468 | 1.869826 | 1.928883 | 2.013987 |
| 94  | 1.794204 | 1.868359 | 1.924023 | 2.015494 |
| 95  | 1.795905 | 1.873667 | 1.929577 | 2.023809 |
| 96  | 1.793589 | 1.870921 | 1.931354 | 2.0158   |
| 97  | 1.795877 | 1.87152  | 1.926352 | 2.019868 |
| 98  | 1.796738 | 1.875854 | 1.932261 | 2.025598 |
| 99  | 1.794532 | 1.872202 | 1.932956 | 2.0181   |
| 100 | 1.793976 | 1.873132 | 1.931663 | 2.020366 |

## Top 50 equations from the DSR algorithm

### Definitions of $x_i$

- x1: number of  $d$ -electrons ( $N_d$ )  
x2: Pauling electronegativity ( $\chi$ )  
x3: atomic radii ( $\mathcal{V}$ )  
x4:  $\Delta G_1$   
x5:  $\Delta G_2$   
x6:  $\Delta G_3$   
x7:  $\Delta G_4$   
x8:  $\max(\Delta G_i)$   
x9:  $ESSI$

### ◆ $1 \text{ mA cm}^{-2}$

| rank | score       | expression                                                             |
|------|-------------|------------------------------------------------------------------------|
| 1    | 0.626387386 | $\sin(x7*\sqrt{x9})/x8)/(4*x3)$                                        |
| 2    | 0.594619589 | $\log(x7**2*(\sqrt{x8})/x6 + \exp(\sqrt{x3}))/5*x3))$                  |
| 3    | 0.594123018 | $x4*\exp(-x3/\sqrt{x2 + \log(x8)})$                                    |
| 4    | 0.59234255  | $x1*x7*\sqrt{x8}*\exp(-3*x3)/x6$                                       |
| 5    | 0.590715766 | $x2*x8/(-x3 + \exp(x6) - \log(x3 + \exp(4*x3**2)))$                    |
| 6    | 0.584795341 | $x4*\sqrt{x8}*\exp(-x3)/x3$                                            |
| 7    | 0.580427469 | $x4*\sqrt{x8*\exp(x2)}/(x3*x7*(x3 + \exp(x3 + \exp(x3))))$             |
| 8    | 0.57518221  | $\sqrt{x8}/(-2*x3 + x6*\exp(x3))$                                      |
| 9    | 0.566854688 | $\cos(\sqrt{x6 - \log(x2*\sqrt{x8})})$                                 |
| 10   | 0.563985324 | $x4*\sqrt{x8*\exp(\sin(x4))}/(x3*x7**2*(x2 + x3 + \exp(x3)))$          |
| 11   | 0.560703461 | $\sin(x4*\sqrt{x8}/(x6*x7))$                                           |
| 12   | 0.559206693 | $x2*\log(\sqrt{x5 + x8})/x6$                                           |
| 13   | 0.558947051 | $x4*x5*\sqrt{x8/\log((x3 + (\exp(x8) + \exp(x2 + 2*x3 + x7))/x2)/x7))$ |
| 14   | 0.558221956 | $\exp(-x6 + x7*x8)$                                                    |
| 15   | 0.558221956 | $\exp(-x6 + x7*x8)$                                                    |
| 16   | 0.557844488 | $\sqrt{x7}*\exp(-x6 + x8)$                                             |
| 17   | 0.554737789 | $\exp(x3 - x6 + x8 - \sin(x3))$                                        |
| 18   | 0.553639807 | $\log(\log(x5*x7*(x2 + \sqrt{x8*\exp(x4*x5*x8)}/x7)))$                 |
| 19   | 0.553203063 | $x4*\sqrt{x8*(-x3 + x7)}$                                              |
| 20   | 0.552592728 | $\log(\log(\sqrt{\exp(x5*x7*(\sqrt{x5}*x8/x7 + x5))))$                 |

|    |             |                                                                           |
|----|-------------|---------------------------------------------------------------------------|
| 21 | 0.551895858 | $\log(\log(\log(x7*x8*(x3 + x5)*\exp(\exp(x5))*\sin(x5)/x3)))$            |
| 22 | 0.55136384  | $x8*(x3 + x5)*\exp(x4)*\exp(-x6)$                                         |
| 23 | 0.551203443 | $x4*\sqrt{\sin(x8/(x6*x7))}$                                              |
| 24 | 0.550416944 | $\exp(-x6/\sqrt{x7}) + x8$                                                |
| 25 | 0.550294923 | $\log(\sin(x5 + \exp(x8*(-2*x3 + x8 - \exp(x3))))/x3)$                    |
| 26 | 0.549986321 | $\sin(\log(\sqrt{x4*\exp(\sqrt{x2*x5*x8/x7}))})$                          |
| 27 | 0.54941232  | $\exp((-x6 + \sin(x8))*\sin(x7))$                                         |
| 28 | 0.548366252 | $x5*(x4 + x8)/\log((-x3 + \exp(x3 + 2*\exp(x3)))/x3)$                     |
| 29 | 0.548222776 | $\exp(x5*x8 - x6)$                                                        |
| 30 | 0.545415629 | $\sqrt{\sqrt{x8}/(x6**2*(-x5 + x7*\exp(x7)*\sin(x7)))}$                   |
| 31 | 0.544197821 | $x8*\exp(-\sin((x4 + x5)/\sqrt{x7*\exp(-x4)}))$                           |
| 32 | 0.544117733 | $\sqrt{x4*\sqrt{x8}*(x5 + x7)/(x3*(x3 + \exp(4*x3)))}$                    |
| 33 | 0.543721375 | $(x4 + x8)*\exp(-\sqrt{x6})$                                              |
| 34 | 0.543261733 | $x5*(-x3 + \cos(x3 - x8))$                                                |
| 35 | 0.543089844 | $\exp(x7*\sin(3*x7/x3))$                                                  |
| 36 | 0.542590164 | $x4*\exp(x8)/\log(x7*(-x3 + \sqrt{x3 + \exp(\exp(3*x3))})/x2)$            |
| 37 | 0.541330811 | $\log(\sqrt{\exp(x7*\log(x2 + \exp(x5))*\sin(\exp(x8)/x6)/(2*x3 + x7)))}$ |
| 38 | 0.541315043 | $\sin(x8/(\exp(x8) + \log(\exp(x6)/(4*x3 + x5 + 2*x7))))$                 |
| 39 | 0.541077507 | $x4*\exp(x8)/(x3 + x6 + x7)$                                              |
| 40 | 0.540946398 | $x4*x5*x7*x8*\sin(x7*\exp(-x8))/(2*x3**2)$                                |
| 41 | 0.540723129 | $x4*\exp(x8)/(-x3 + \exp(\sqrt{x3}) + \exp(x3))$                          |
| 42 | 0.540334714 | $x7 - \sin(\sqrt{x2*(x2 + x8*\log(x5 + x5/x9 - x7 - x9))})$               |
| 43 | 0.53842398  | $\sin(\log(x4 + \sqrt{x8}))$                                              |
| 44 | 0.53842398  | $\sin(\log(x4 + \sqrt{x8}))$                                              |
| 45 | 0.53842398  | $\sin(\log(x4 + \sqrt{x8}))$                                              |
| 46 | 0.538416256 | $\log(x2 - \log(\sqrt{\exp(\sqrt{\cos(x3*(2*x3 + \exp(\exp(x3))))})})$    |
| 47 | 0.538370757 | $(x4 + x8)/(2*x3**2*x6 + x3 + x4 + \sqrt{x8})$                            |
| 48 | 0.538111251 | $x3*\cos(x7)/\sin(\exp(\exp(x3)))$                                        |
| 49 | 0.538075781 | $\sqrt{\log(\log(\sqrt{x5}*(x5 + \exp(x8*(x7 - \log(x2))))))}$            |
| 50 | 0.538018053 | $\sqrt{\sin(x4*x8)} - \cos(x5)$                                           |

◆  $5 \text{ mA cm}^{-2}$

| rank | score       | expression                                                    |
|------|-------------|---------------------------------------------------------------|
| 1    | 0.726103885 | $x9/(x5*x8*(x3 + x5**2*(-x2*x5 + x3*x4)/x6 + \sin(x3)) + x7)$ |
| 2    | 0.711196932 | $\exp(\cos(x2/(2*x3**7*x5*(x3 + 2*x5)) + x3))$                |

|    |             |                                                                         |
|----|-------------|-------------------------------------------------------------------------|
| 3  | 0.710022782 | $\exp(\sin(x1 - x3*(x3*(4*x3 + x5)*\exp(x5) - x3)))$                    |
| 4  | 0.709312752 | $\exp(\cos(x2*x7/(4*x3**6*x5**2) + x3))$                                |
| 5  | 0.705596347 | $\exp(-\sin(x1*x4**2*x8/(x3*(x3 + x9)) + x3 - x7))$                     |
| 6  | 0.70384991  | $\exp(\cos(x2/(x3**5*x5*x7*(2*x3 + x5)) + x3))$                         |
| 7  | 0.700509974 | $\exp(\cos(x1*x5*x6 + x3*x5*(2*x3 + x5)))$                              |
| 8  | 0.700509974 | $\exp(\cos(x1*x5*x6 + x3*x5*(2*x3 + x5)))$                              |
| 9  | 0.700509974 | $\exp(\cos(x1*x5*x6 + x3*x5*(2*x3 + x5)))$                              |
| 10 | 0.69954978  | $\exp(\cos(x2/(4*x3**6*x5**2) + x7))$                                   |
| 11 | 0.69954978  | $\exp(\cos(x2/(4*x3**6*x5**2) + x7))$                                   |
| 12 | 0.699154378 | $x9 - \log(\log(x2*\log(x9 + \exp(-x8 + x9)/x4) + x2))$                 |
| 13 | 0.698446224 | $x8*\exp(x3*\sin(x5*(x3 + x5)**2) - x3 + \sin(x6))$                     |
| 14 | 0.698260809 | $\exp(\cos(x3**2*(x3 + \exp(x3**2*(x3*x5 + x3 + x4 + x5))) + x3 - x7))$ |
| 15 | 0.697945366 | $\exp(\sin(\exp(x3*(x3*(2*x3 + 2*x5) - x3))))$                          |
| 16 | 0.697874996 | $\exp(\cos(\sqrt{x3*(x3**2*\exp(5*x3**2*x5) - 2*x3)}))$                 |
| 17 | 0.697262399 | $\exp(\cos(x2*(-x3*(x3*(x3*x5*(2*x3 + 2*x5) + x3) + x3) + x7)))$        |
| 18 | 0.695874403 | $\exp(\cos(x6/\log(5*x3**4*x5)))$                                       |
| 19 | 0.695874403 | $\exp(\cos(x6/\log(5*x3**4*x5)))$                                       |
| 20 | 0.695874403 | $\exp(\cos(x6/\log(5*x3**4*x5)))$                                       |
| 21 | 0.695874403 | $\exp(\cos(x6/\log(5*x3**4*x5)))$                                       |
| 22 | 0.695874403 | $\exp(\cos(x6/\log(5*x3**4*x5)))$                                       |
| 23 | 0.695874403 | $\exp(\cos(x6/\log(5*x3**4*x5)))$                                       |
| 24 | 0.694832465 | $\exp(\cos(x2*x3**2*(x3*(4*x3 + x5) + x3) - x8))$                       |
| 25 | 0.694708598 | $\exp(\cos(\exp(x3**3*x7*(4*x3*x5 + x3) - x3)))$                        |
| 26 | 0.694120206 | $\exp(\cos(x5*(x2 + x9)/(x3**2*(x3*x5*x7 + x3))))$                      |
| 27 | 0.693631434 | $\exp(\cos(x2*x3**(3/2)*x6*(x2*x4*x5 + x2*x5) + x5))$                   |
| 28 | 0.69264789  | $\exp(\cos(\sqrt{x1}*(x3**3*(2*x3 + 3*x5) - x3)))$                      |
| 29 | 0.692083671 | $\exp(\cos(x3**3*(x3*(4*x3 + x5)*\exp(x5) + x3) - x7))$                 |
| 30 | 0.691631932 | $\exp(\cos(\exp(x3*(x3**3*x5*(3*x3 + 2*x5) - x3))))$                    |
| 31 | 0.691353983 | $\log(x3*\sin(x5*(4*x3*x5 + x3)) + \exp(x8))$                           |
| 32 | 0.690518655 | $\exp(\cos((-x3 + \exp(x3**2*(x3*(x3*x5*(3*x3 + x5) + x3) - x3)))/x3))$ |
| 33 | 0.690300574 | $\exp(\cos(x2*\exp(x3)/(x3**4*x5*(3*x3 + x5))))$                        |
| 34 | 0.689867328 | $\exp(\cos(x5*\sqrt{x6}*(4*x3**2*x5 + x3 + \exp(x3))))$                 |
| 35 | 0.68905286  | $\exp(\cos(x6*(-x3**2*(5*x3 + x4 + x5) - x3 + x6))$                     |
| 36 | 0.688958088 | $\exp(\cos(x3**3*(x3 + x7*\exp(x3**2*(x4 + 2*x5))) - x3 + x7))$         |



|    |             |                                                                          |
|----|-------------|--------------------------------------------------------------------------|
| 37 | 0.688605381 | $\exp(\cos(x6*(-x3*(x3^{**2}*(x3 + x5*(3*x3 + x5)) + 2*x3) - x3 + x6)))$ |
| 38 | 0.688603669 | $\exp(\cos(\exp(x2)/(x3^{**3}*x5*(4*x3 + x5))))$                         |
| 39 | 0.688603669 | $\exp(\cos(\exp(x2)/(x3^{**3}*x5*(4*x3 + x5))))$                         |
| 40 | 0.688603669 | $\exp(\cos(\exp(x2)/(x3^{**3}*x5*(4*x3 + x5))))$                         |
| 41 | 0.688043202 | $\exp(\cos(x2 + x7/(x3^{**6}*x5^{**2}*(3*x3 + x5))))$                    |
| 42 | 0.688043202 | $\exp(\cos(x2 + x7/(x3^{**6}*x5^{**2}*(3*x3 + x5))))$                    |
| 43 | 0.688043202 | $\exp(\cos(x2 + x7/(x3^{**6}*x5^{**2}*(3*x3 + x5))))$                    |
| 44 | 0.688043202 | $\exp(\cos(x2 + x7/(x3^{**6}*x5^{**2}*(3*x3 + x5))))$                    |
| 45 | 0.688043202 | $\exp(\cos(x2 + x7/(x3^{**6}*x5^{**2}*(3*x3 + x5))))$                    |
| 46 | 0.686984535 | $\exp(\cos(x2*x3^{**2}*(x3^{**2}*(3*x3 + 2*x5) + 2*x3) - x8))$           |
| 47 | 0.686847126 | $\exp(\sin(x3^{**2}*(8*x3*x5 + x5)))$                                    |
| 48 | 0.686497603 | $\exp(\sin(\log(\log(\log(2*x3^{**3}*(2*x3 + x5))/x3^{**2}))))$          |
| 49 | 0.685992094 | $\exp(\cos(x2*(x3^{**2}*(x3*x5*(4*x3 + x5) + x3) - x3)))$                |
| 50 | 0.685257292 | $\log(x4*(x7*\sin((x5*x7^{**2}*x8 + x7)/x7) + x8) + x9)$                 |

◆  $10 \text{ mA cm}^{-2}$

| rank | score       | expression                                                         |
|------|-------------|--------------------------------------------------------------------|
| 1    | 0.72010348  | $\exp(\sin(\log(\log(\sqrt{x8} + x9/x8))))$                        |
| 2    | 0.71734414  | $x4*x7^{**2}*x8 + x9 + \log(x4)$                                   |
| 3    | 0.716224351 | $x4 + x9 - \cos(x4*x5^{**3}*x7*x8)$                                |
| 4    | 0.714385626 | $\exp(\sin(x6/\log((x6 + x9)/x6)))$                                |
| 5    | 0.712262645 | $\exp(\sin(\log(\log(\log(x1*x7*x9 + x2))))))$                     |
| 6    | 0.709186794 | $\exp(\cos(x9 + \exp(x9/x8) + \log(x6)))$                          |
| 7    | 0.707559694 | $\exp(\sin(x1/(-x7 + x8*x9 + \log(x5))))$                          |
| 8    | 0.707340129 | $\log(x4^{**2} + x9 + \sqrt{\sin(x8)})$                            |
| 9    | 0.705611295 | $\sin(\sqrt{x7*\sqrt{x8*(x1*x8^{**2}*x9^{**3} + x8)}}) + \log(x4)$ |
| 10   | 0.704769814 | $\sqrt{x8*(x5 + \cos(x9 - \exp(x5)))}$                             |
| 11   | 0.70373112  | $(x7*\sin(x7*x8^{**2}*x9^{**2}) + x7)*\sin(\log(x4 + \sqrt{x8}))$  |
| 12   | 0.702439762 | $\exp(-\sin(x8 - \log(x9/(x4*x7))))$                               |
| 13   | 0.701975412 | $\exp(\sin(\log(x9*\log(x5 + x9/x8))))$                            |
| 14   | 0.701571966 | $\cos(\sqrt{x2} - x7 + x8 + x9 - \sqrt{\exp(x6*x7/x5)})$           |
| 15   | 0.70130261  | $(x4 + x8 - \cos(x7) - \cos(x7 + x9))/x6$                          |
| 16   | 0.700089296 | $\exp(\sin(x4*\log(x9/(x7 + x8))))$                                |
| 17   | 0.699996664 | $\exp(\cos(-x1*x7 + x3/x9 + x4))$                                  |

|    |             |                                                                                  |
|----|-------------|----------------------------------------------------------------------------------|
| 18 | 0.699830724 | $\exp(\sin(\log(\log(\sqrt{x^2} + x^9 + \log(x^3))))))$                          |
| 19 | 0.698943694 | $\exp(\sin(x^7 \log(x^9) - x^8 + \log((x^8 x^9 + x^8)/x^8)))$                    |
| 20 | 0.698394733 | $\log(x^8 + \log(x^5)) + \sin(x^9/(x^5 x^7^{**2} x^8^{**2}))$                    |
| 21 | 0.69805703  | $\exp(\cos(2*x^6 - x^8 + x^9))$                                                  |
| 22 | 0.69805703  | $\exp(\cos(2*x^6 - x^8 + x^9))$                                                  |
| 23 | 0.696663774 | $\sqrt{x^8}/\cos(x^8^{**2} x^9) + \log(x^4)$                                     |
| 24 | 0.695694613 | $x^4 + x^5 \log(x^2 - \cos(x^9))/x^8$                                            |
| 25 | 0.695416159 | $\exp(\sin(\log(x^8*(-x^5 + x^8) + \sqrt{x^9})))$                                |
| 26 | 0.695256754 | $\exp(\sin(\log(\log(x^3 + (x^7 x^9*(x^9^{**2} + x^9)*\exp(x^9))^{**}(1/4))))))$ |
| 27 | 0.695233868 | $\exp(\sin(x^7*(x^3 + x^8)*\log(x^9/x^7)))$                                      |
| 28 | 0.695013437 | $\exp(\sin(-x^7^{**2} x^8 + x^8 x^9 + \log(x^9)))$                               |
| 29 | 0.695006388 | $\exp(\sin(x^7*(-x^7 + \log(\exp(x^9) + \log(x^9/(x^7 x^8))))))$                 |
| 30 | 0.694301322 | $\exp(\sin(x^7 \log(x^3 x^5 x^9)))$                                              |
| 31 | 0.693951765 | $\exp(\sin(x^1 x^5 \sqrt{x^7 x^9}))$                                             |
| 32 | 0.692677022 | $\exp(-x^6 \cos(x^9) + \sqrt{x^8})$                                              |
| 33 | 0.692531829 | $\sin(x^5 + x^6 - (x^7 x^8^{**4} x^9^{**2})^{**}(1/4))$                          |
| 34 | 0.692436227 | $\log(x^5 x^7^{**2} \sin(x^5 x^7 \log(x^5)) + x^9 + \sin(x^8))$                  |
| 35 | 0.69212699  | $\sin(x^4 \sqrt{x^8}) \log(\sqrt{x^4})/x^9 + \sqrt{x^8}$                         |
| 36 | 0.691802405 | $\sqrt{\exp(-x^7 + \sin(x^7^{**2} \log(x^9))) + \sin(x^8)/x^2}$                  |
| 37 | 0.691582201 | $\exp(\sin((x^7 x^8 \exp((x^5 - x^9) \exp(-x^8)) + x^7) \exp(x^4)))$             |
| 38 | 0.691490977 | $\exp(\sin(\log(x^9*(x^3 + x^9*(-x^9^{**2} + x^9))))))$                          |
| 39 | 0.691389776 | $x^4 + \sin(x^7 + (x^5 \sqrt{x^7^{**2} x^8 x^9} - 2*x^7)/x^7)$                   |
| 40 | 0.690984489 | $\exp(\sin(\log(x^2 - x^7)/x^9))$                                                |
| 41 | 0.690984489 | $\exp(\sin(\log(x^2 - x^7)/x^9))$                                                |
| 42 | 0.69089839  | $\sin(\sqrt{\log(x^5 + x^9*(x^9 + \log(x^8))))})$                                |
| 43 | 0.690829094 | $\exp(\sin(\exp(x^7 \exp(x^9))/(x^3 + x^9)))$                                    |
| 44 | 0.690742822 | $\exp(\sin(\log(x^3 \sqrt{x^7} x^9)))$                                           |
| 45 | 0.690742822 | $\exp(\sin(\log(x^3 \sqrt{x^7} x^9)))$                                           |
| 46 | 0.690742822 | $\exp(\sin(\log(x^3 \sqrt{x^7} x^9)))$                                           |
| 47 | 0.690742822 | $\exp(\sin(\log(x^3 \sqrt{x^7} x^9)))$                                           |
| 48 | 0.690742822 | $\exp(\sin(\log(x^3 \sqrt{x^7} x^9)))$                                           |
| 49 | 0.690323148 | $\exp(\sin(\log(\sqrt{x^3^{**}(3/2)} x^9^{**2})))$                               |
| 50 | 0.689778152 | $\exp(\sin(\log(\sqrt{x^3} x^9/x^7)))$                                           |

◆ 20 mA cm<sup>-2</sup>

| rank | score       | expression                                                                             |
|------|-------------|----------------------------------------------------------------------------------------|
| 1    | 0.751827993 | $-x^3 + x^8 - \sin(x^3 - x^6/(x^2*x^3*x^8*\sqrt{x^3*x^5*(x^3**2 + x^3 + x^7) + x^3}))$ |
| 2    | 0.697920925 | $x^3**2*\exp(\sin(x^5 + \exp(\exp(\sqrt{x^1*x^2*x^5}))))$                              |
| 3    | 0.685037173 | $\exp(\cos(\exp(\sqrt{x^7})*(x^2 + 2*x^3)))$                                           |
| 4    | 0.652181114 | $\exp(\cos(\exp(-x^3 + \log(x^5*x^6/(x^3**4*(2*x^3 + x^7)))/x^3))$                     |
| 5    | 0.647320156 | $\exp(\cos(\exp(x^6)*\log(\log(x^3*(x^3**2*(4*x^3 + 3*x^5) - x^3)))/x^3))$             |
| 6    | 0.646359666 | $\exp(\cos(x^3**2/(x^3*\log(x^3*x^5*(6*x^3**2 + x^3)) - x^3))$                         |
| 7    | 0.635930883 | $\exp(\cos(\exp(\log(x^1)*\log((x^3**2*(x^3*(2*x^3 + x^4) + 3*x^3) - x^3)/x^3)/x^3))$  |
| 8    | 0.631275806 | $\exp(\cos(x^5/(x^3*\log(x^3**2*(x^3*(3*x^3 + 3*x^4) + x^3))))$                        |
| 9    | 0.627682476 | $\exp(\sin(x^7)*\cos(x^2/(x^3*(x^2*x^3**2*(x^3*x^5 + x^3) - x^3)))$                    |
| 10   | 0.624317782 | $\exp(\sin(\exp(x^7 - (x^3*x^9 - x^8)*(x^3*(x^3*(x^3**2 + x^3) + 3*x^3) + x^3)/x^3))$  |
| 11   | 0.622635186 | $\exp(-\sin(x^3*x^9/(3*x^3**4*x^7 - x^3) - x^9/x^2))$                                  |
| 12   | 0.622030016 | $\exp(\sin(\exp(x^3**2*(x^3*(x^3*\exp(x^3*x^5**2*x^7) + x^9) + x^3)))$                 |
| 13   | 0.621733408 | $\exp(\cos(2*x^3 - x^5*x^6/(x^3**4*(x^3*(x^3**2 + 2*x^3) + x^3)))$                     |
| 14   | 0.61824896  | $\exp(\cos(1/(x^3*\log(x^3**2*(x^3*(x^3 + x^4*x^5) + 3*x^3))))$                        |
| 15   | 0.617720184 | $\exp(\sin(\log(-x^3**5*x^8*(x^3 + x^7)/(x^3 + x^9) + x^9))$                           |
| 16   | 0.616441035 | $\exp(\sin(x^8 - \sqrt{\exp(x^3)} + \exp(x^2**2*x^3))$                                 |
| 17   | 0.61441548  | $x^8*(-x^3*\exp(\sin(x^3**3*x^6)) - x^3 + x^5*\exp(\cos(x^3)))/x^3$                    |
| 18   | 0.614003434 | $\exp(\sin(x^1*(x^2*x^3**2*x^5 + x^6))$                                                |
| 19   | 0.612971851 | $\exp(x^3*(x^3**2*\sin(x^3 + \exp(x^7/(x^2*x^5 - x^3**2 - 2*x^3))) - x^3))$            |
| 20   | 0.612470228 | $\sqrt{\exp(\log(x^1)*\cos(x^3 + 1/(x^3**5*(x^3*(x^4 + x^5) + x^3))))$                 |
| 21   | 0.609504993 | $\exp(\sin(x^3*(-x^3 + x^5*(-x^3 + x^7*\exp(2*x^3*(x^3**2 + x^3))))$                   |
| 22   | 0.608961897 | $\exp(\cos(\exp(\log(x^2)/(x^3*(x^3*(x^3*(x^3 + x^4) + 3*x^3) - 2*x^3))))$             |
| 23   | 0.608536392 | $\exp(\sin(x^2/\log(x^3**2*x^5*x^7*(x^3**2*x^7 + 2*x^3)))$                             |
| 24   | 0.60830422  | $\exp(\cos(1/(x^5*\log(x^7*(x^3**3*(x^3**2*x^7 + x^3) + x^3))))$                       |
| 25   | 0.607953404 | $x^3*\sin(x^3*\exp((x^3*x^4*x^5*x^7 + x^3 + x^4)*\log(x^1)))$                          |
| 26   | 0.606795533 | $\sqrt{\exp(-x^2*\exp(x^3)*\log(x^3*(x^3*(x^3*x^5 + 2*x^3) + x^3)) + \sin(x^3/x^8))$   |
| 27   | 0.605203056 | $\cos(x^7)/\sin(x^7/(x^3*\log(x^3*(x^3*(x^3 + x^5**2) + 2*x^3)))$                      |
| 28   | 0.602861872 | $\exp(-\sin(2*x^3 - x^3*x^9*\exp(x^9)/(x^2*\log(x^3**2*x^7*(x^3*x^7 + 2*x^3))))$       |
| 29   | 0.602830864 | $\exp(\cos(\sqrt{\exp(\exp(\log(x^7)/(x^3**2*(x^3**2*x^7*(x^3*x^4 + 2*x^3) -$          |

|    |             |                                                                                    |
|----|-------------|------------------------------------------------------------------------------------|
|    |             | x3))))))                                                                           |
| 30 | 0.601776646 | $\exp(\cos(x3/\log(x3^{*(x3^{**3}*(x3*x4*x5^{**2} + x3) + x7))))$                  |
| 31 | 0.601754198 | $\exp(\cos(x1*x5*\log(x3^{**2}*(x3*(x3^{**2} + x3) + x3) + x3)))$                  |
| 32 | 0.601721368 | $x5*\sqrt{x8}*\cos(x3 + \log(x3^{**3}*(x3*x7 + 4*x3)))$                            |
| 33 | 0.60161463  | $\log(x7 + \exp(\cos((x3^{**2}*x7*(x3*(x3*x5*x7 + x3) + x3) - x3)*\exp(x2))))$     |
| 34 | 0.601061156 | $\exp(\cos(x3*x6/\log(x3^{**3}*(x3*x5 + 5*x3))))$                                  |
| 35 | 0.600992451 | $\exp(\sin(\log(-x3*x8/(x2 + x3^{**4}*x5*x7) + x9)))$                              |
| 36 | 0.600830232 | $\exp(\cos(x3 + \log(x6/\log(x3^{**2}*(2*x3*x5 + 3*x3) - x3))))$                   |
| 37 | 0.600367642 | $\exp(\cos(x1*x3^{**4}*(x3*(x3 + x5) + 2*x3) - x7))$                               |
| 38 | 0.600248909 | $x8*(-x3^{**2}*(x3^{**3} + 3*x3) + x4 + x5)/x3$                                    |
| 39 | 0.599679916 | $\exp(\cos(x7 - \exp(x1*x3^{**4})))$                                               |
| 40 | 0.599411826 | $\sin(\sqrt{x8*(x2*x7 - x3*(x3*(x3*(2*x3 + x7) + x3) + x3))/x3})$                  |
| 41 | 0.599167343 | $\exp(\sin(x3*\exp(x3*(x3*(2*x3*x4*x5 + 2*x3) + x3)) - x3 + x9))$                  |
| 42 | 0.598702034 | $x3*x9*\cos(x1)/\log(x3*(x3^{**2}*(2*x3^{**4} + x3) + 2*x3))$                      |
| 43 | 0.598643842 | $\sqrt{x8*\cos(\log(x2*x5/(6*x3^{**3}) - x3))}$                                    |
| 44 | 0.598456984 | $\sqrt{\exp(-x3 + \cos(x3^{**2}*\exp(x3*x5*x7*(x3*(2*x3^{**2} + x3) + x3) - x3))}$ |
| 45 | 0.598249875 | $x3*x8/\sin(x3*x4*x5*(x3^{**3} + 4*x3))$                                           |
| 46 | 0.598193536 | $2*x3 + \sin(x3^{**2}*x7*(x1 + x6))$                                               |
| 47 | 0.597715653 | $x3/(x2 + \log(\sin((x3^{**4}*(2*x3 + 3*x5) - x3)/x3))/x3)$                        |
| 48 | 0.597664628 | $\exp(\cos(x3)*\cos(x7*\log(x6/(x3*\log(x3*(3*x3 + x5) + x3) - x3))))$             |
| 49 | 0.597629801 | $\sqrt{x8*\cos(x3 - (-x3*(x3^{**2}*(4*x3^{**2} + x3) + x3) + x5)/x3)}$             |
| 50 | 0.597354556 | $\exp(\cos(x2*(\log(x4) + \log(x7*(x3*(x3^{**2}*(x3^{**2} + x3) + x3) - x3))))$    |

## REFERENCES

- 1 T. Wang, X. Li, Y. Pang, X. Gao, Z. Kou, J. Tang and J. Wang, *Chem. Eng. J.*, 2021, **425**, 131491.
- 2 A. J. Tkalych, H. L. Zhuang and E. A. Carter, *ACS Catal.*, 2017, 11.
- 3 P. Gono and A. Pasquarello, *J. Chem. Phys.*, 2021, **154**, 024706.
- 4 H. Xiao, H. Shin and W. A. Goddard, *Proc. Natl. Acad. Sci.*, 2018, **115**, 5872–5877.
- 5 J. M. P. Martirez and E. A. Carter, *J. Am. Chem. Soc.*, 2019, **141**, 693–705.
- 6 Y.-F. Li and A. Selloni, *ACS Catal.*, 2014, **4**, 1148–1153.
- 7 S. Kang, K. Ham, H.-K. Lim and J. Lee, *Electrochimica Acta*, 2021, **386**, 138401.
- 8 J. Wang, Y. Gao, H. Kong, J. Kim, S. Choi, F. Ciucci, Y. Hao, S. Yang, Z. Shao and J. Lim, *Chem. Soc. Rev.*, 2020, **49**, 9154–9196.
- 9 K. Wang, H. Du, S. He, L. Liu, K. Yang, J. Sun, Y. Liu, Z. Du, L. Xie, W. Ai and W. Huang, *Adv. Mater.*, 2021, **33**, 2005587.
- 10 P. Yan, Q. Liu, H. Zhang, L. Qiu, H. Bin Wu and X.-Y. Yu, *J. Mater. Chem. A*, 2021, **9**, 15586–15594.
- 11 O. Piqué, F. Illas and F. Calle-Vallejo, *Phys. Chem. Chem. Phys.*, 2020, **22**, 6797–6803.
- 12 *Wikipedia*, 2022.
- 13 Radii for All Species, <http://abulafia.mt.ic.ac.uk/shannon/radius.php>, (accessed February 11, 2022).
- 14 H. Shin, H. Xiao and W. A. Goddard, *J. Am. Chem. Soc.*, 2018, **140**, 6745–6748.
- 15 Z. Xue, X. Zhang, J. Qin and R. Liu, *J. Mater. Chem. A*, 2019, **7**, 23091–23097.
- 16 Y. Zhou and N. López, *ACS Catal.*, 2020, **10**, 6254–6261.
- 17 J. Dong, Y. Lu, X. Tian, F.-Q. Zhang, S. Chen, W. Yan, H.-L. He, Y. Wang, Y.-B. Zhang, Y. Qin, M. Sui, X.-M. Zhang and X. Fan, *Small*, 2020, **16**, 2003824.
- 18 S. Niu, W.-J. Jiang, Z. Wei, T. Tang, J. Ma, J.-S. Hu and L.-J. Wan, *J. Am. Chem. Soc.*, 2019, **141**, 7005–7013.
- 19 C. Gang, J. Chen, Q. Chen and Y. Chen, *J. Colloid Interface Sci.*, 2021, **600**, 594–601.
- 20 Z. Zhao, P. Schlexer Lamoureux, A. Kulkarni and M. Bajdich, *ChemCatChem*, 2019, **11**, 3423–3431.
- 21 J. Park, S. Bae, J.-S. Park, S. Bong and J. Lee, *ACS Appl. Nano Mater.*, 2021, acsanm.1c01388.
- 22 W. Guo, D. Li, D. Zhong, S. Chen, G. Hao, G. Liu, J. Li and Q. Zhao, *Nanoscale*, 2020, **12**, 983–990.
- 23 L. Li, P. Ma, S. Hussain, L. Jia, D. Lin, X. Yin, Y. Lin, Z. Cheng and L. Wang, *Sustain. Energy Fuels*, 2019, **3**, 1749–1756.
- 24 X. Ji, Y. Lin, J. Zeng, Z. Ren, Z. Lin, Y. Mu, Y. Qiu and J. Yu, *Nat. Commun.*, 2021, **12**, 1380.
- 25 L. Cai, J. Zhao, H. Li, J. Park, I. S. Cho, H. S. Han and X. Zheng, *ACS Energy Lett.*, 2016, **1**, 624–632.
